# Supplementary material
Source: MDPI journal article supplement (https://www.mdpi.com/2079-3197/10/4/49)
Supplement: s1 [file s1]

# Multiple Imputation of Missing Data in Educational Production Functions

Amira Elasa

Supplementary materials

Missing value patterns

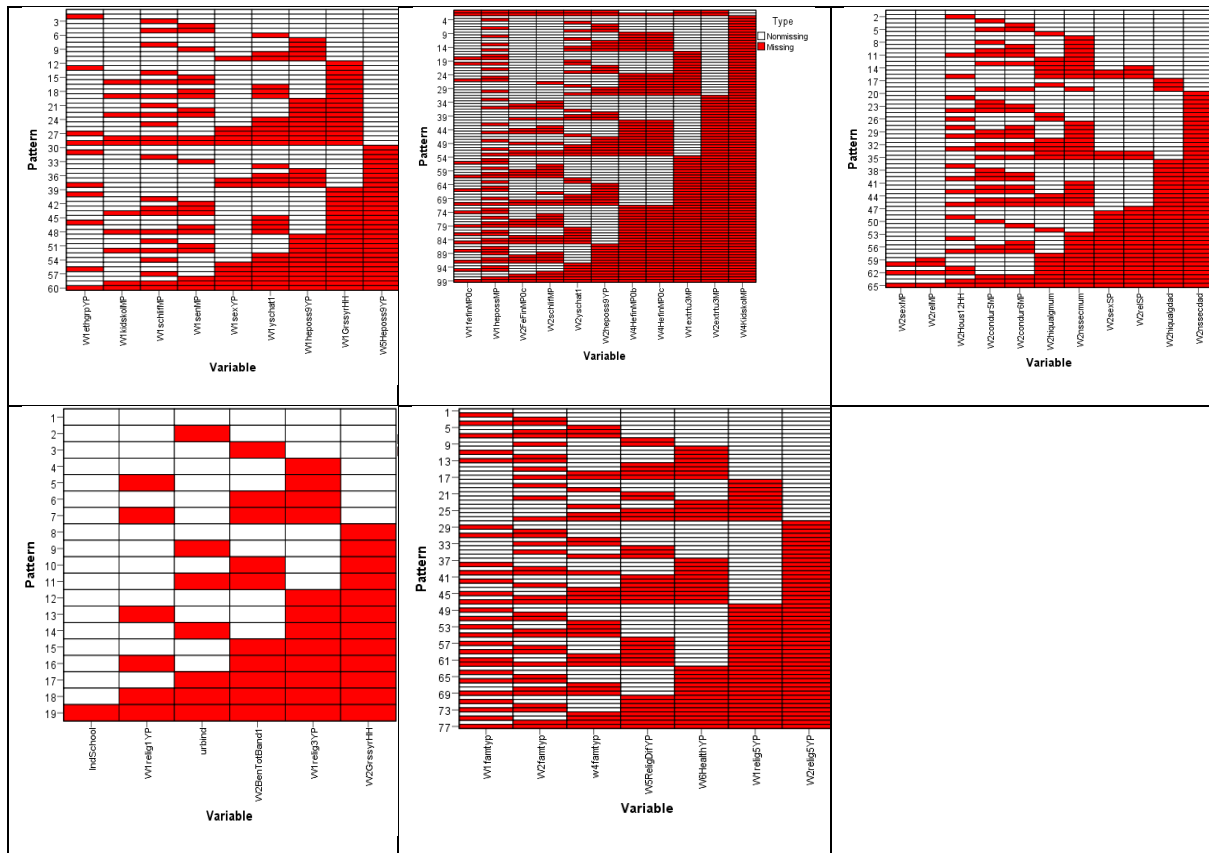

Figure S1. Missing value patterns.

## Variable definition

**Table S1.** Variable definitions

| <b>Code</b>                                | <b>Variable Name</b>                                                                                                |
|--------------------------------------------|---------------------------------------------------------------------------------------------------------------------|
| <b>KS4_PASS_AG</b>                         | KS4 Total number of GCSE qualifications at grades A*-G (GCSE equivalencies).                                        |
| <b>KS4_PTSTNEWG</b>                        | Key stage 4 total GCSE/GNVQ new style point score.                                                                  |
| <b>W7PayYrMain_Banded1</b>                 | Average yearly pay for main job (wave 7).                                                                           |
| <b>W2BenTotBand1</b>                       | Banded total amount of benefits (Wave 2).                                                                           |
| <b>W1GrssyrHH</b><br><b>W2GrssyrHH</b>     | Gross annual salary of HH (edited) for wave 1-2.                                                                    |
| <b>KS4_CVAP3APS</b><br><b>KS4_CVAP2APS</b> | Prior attainment measured by key stage 3 and 2 average point score (using fine grading) for contextual value added. |
| <b>KS4_AGE_START</b>                       | Young person's age when started KS4.                                                                                |
| <b>KS4_IDACI</b>                           | Income Deprivation Affecting Children Index.                                                                        |
| <b>W1yschat1</b><br><b>W2yschat1</b>       | Mean score of the young person's attitude to school for wave 1-2.                                                   |

## Algorithm convergence plots

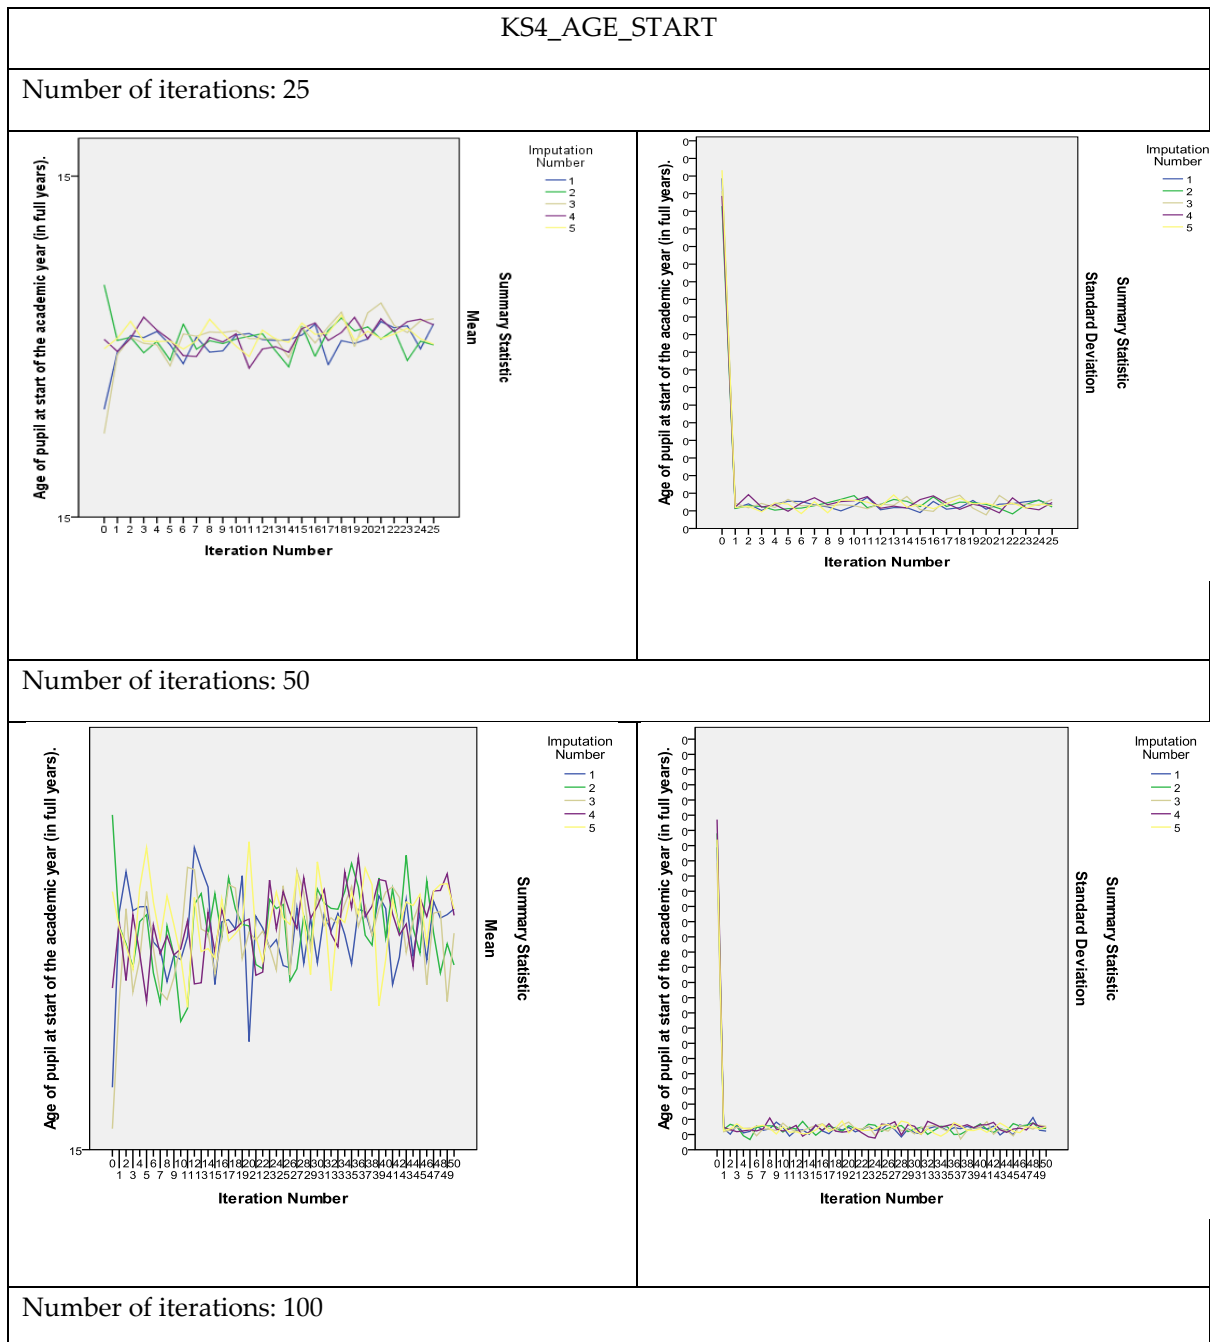

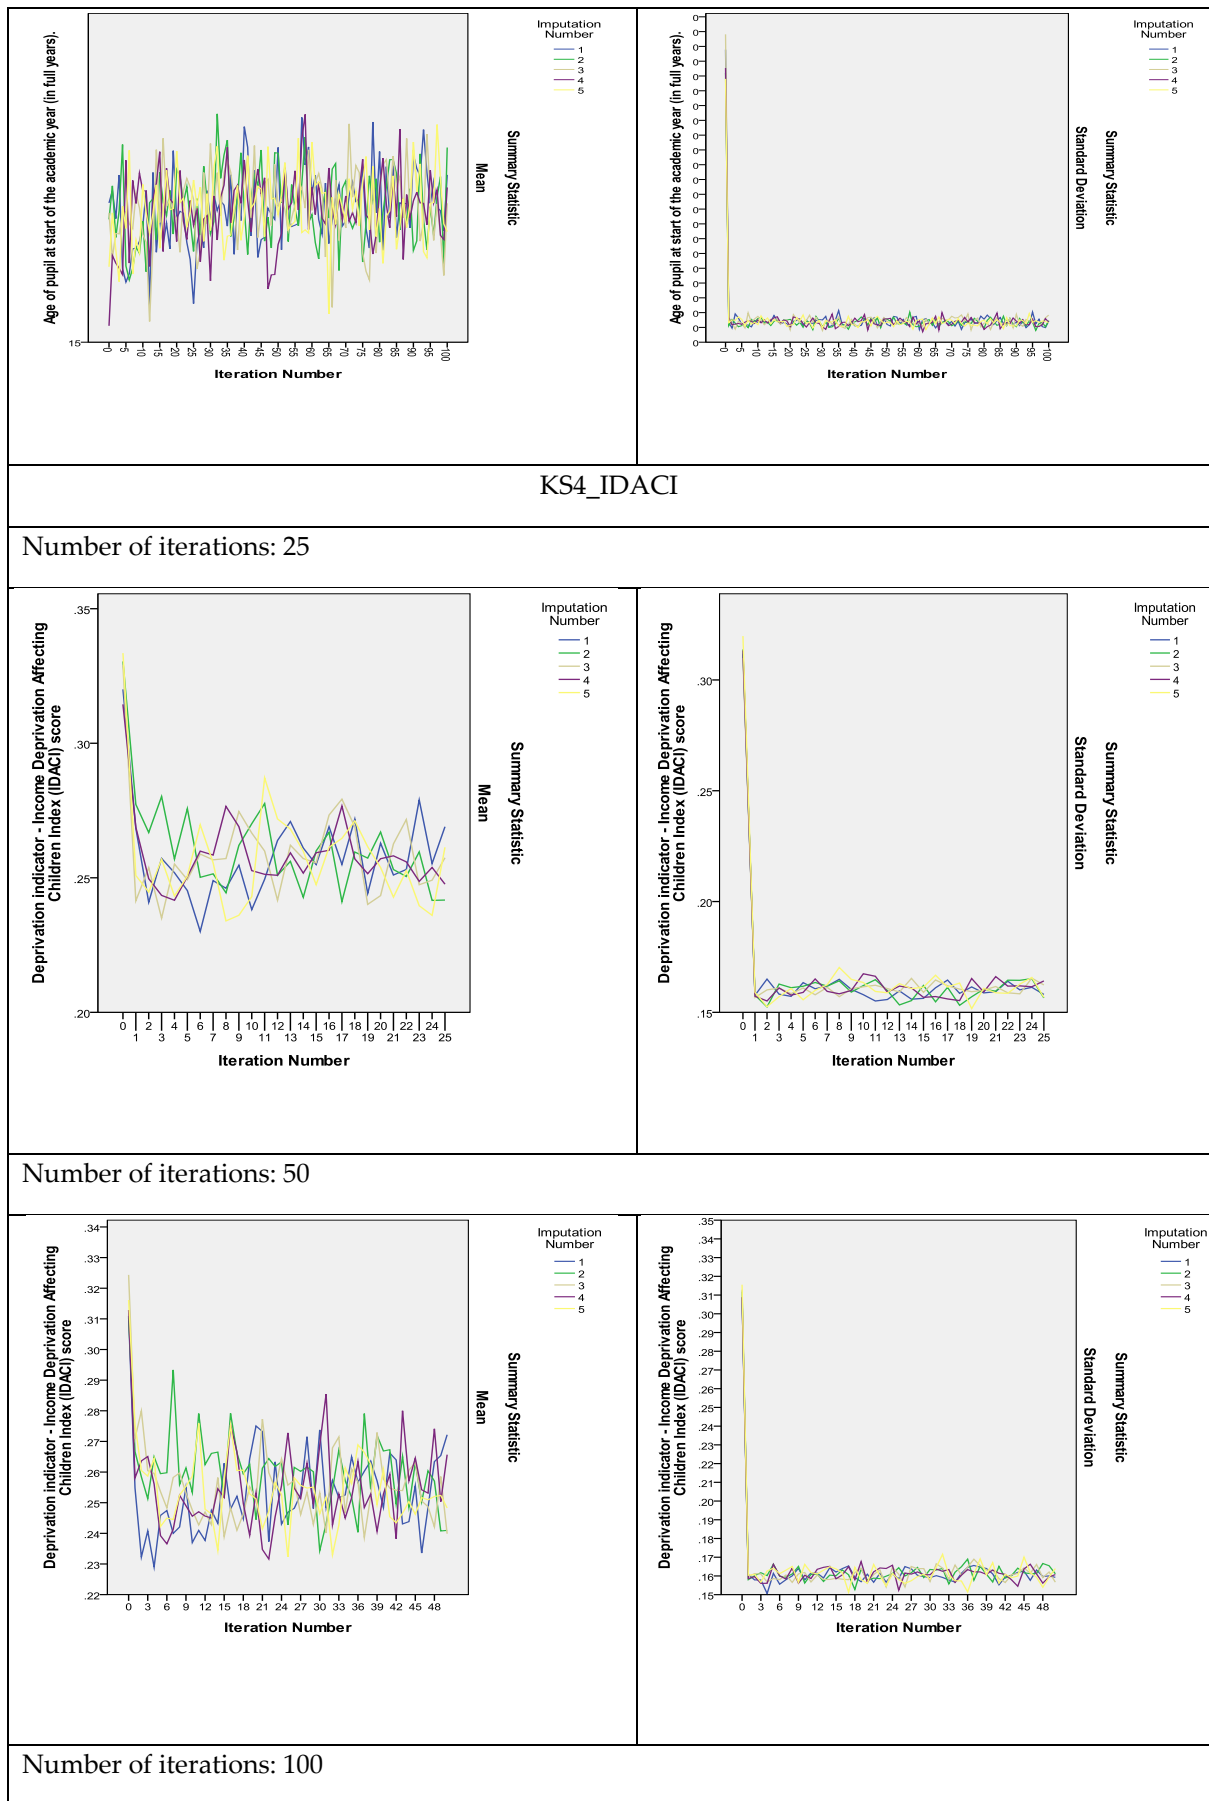

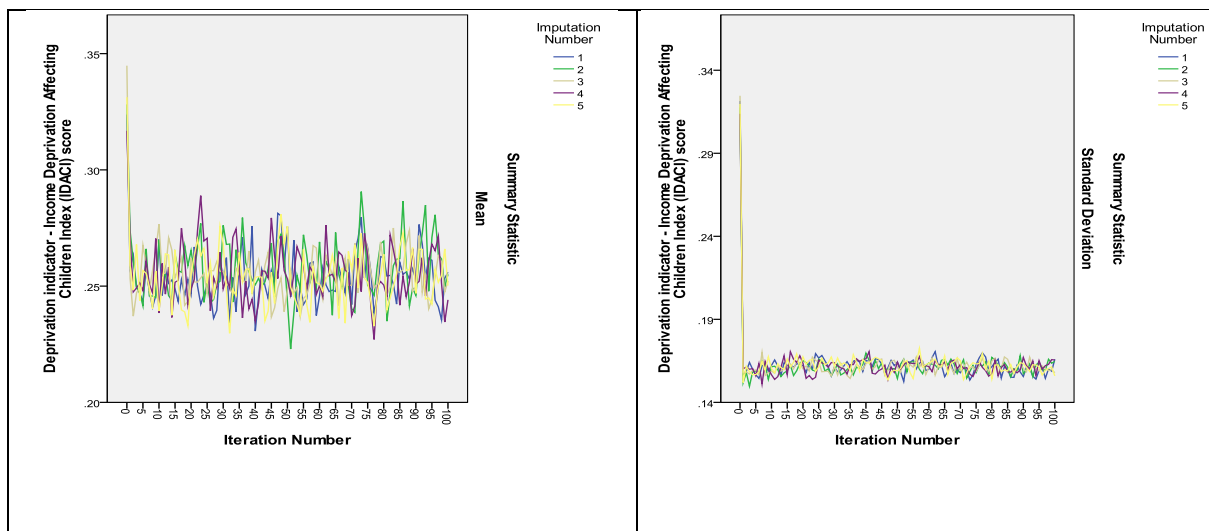

KS4\_PASS\_AG

Number of iterations: 25

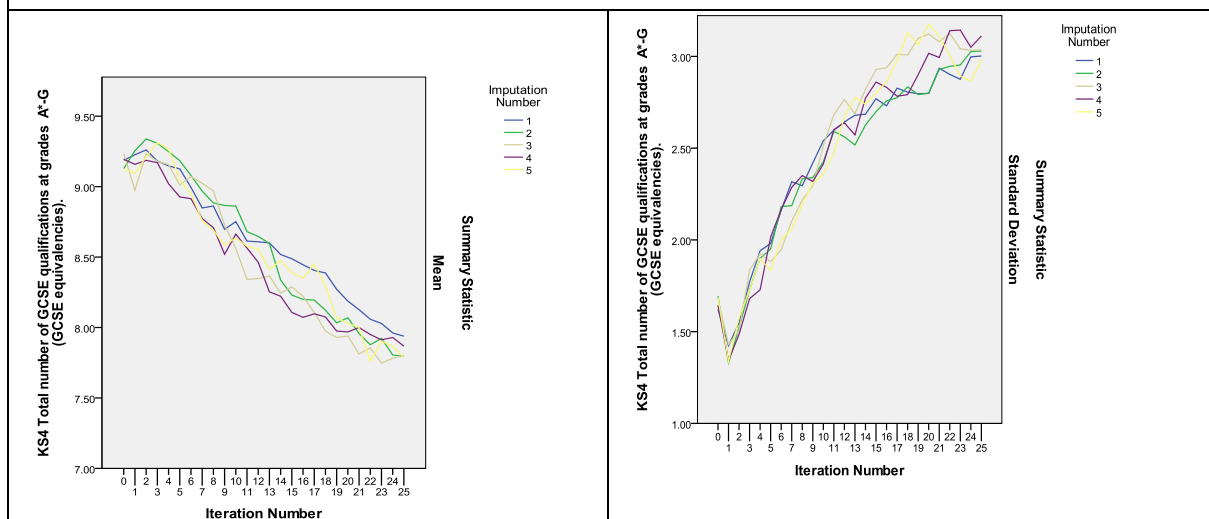

Number of iterations: 50

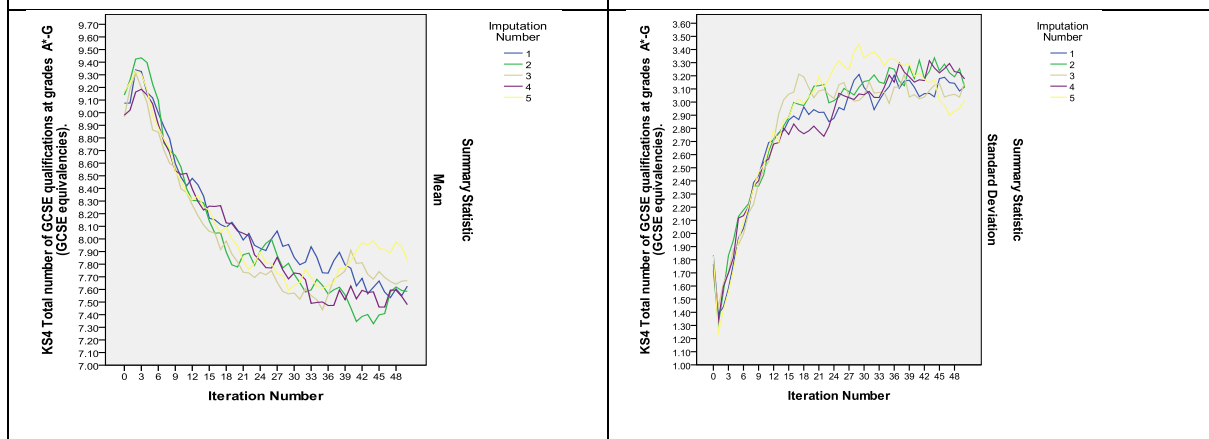

Number of iterations: 100

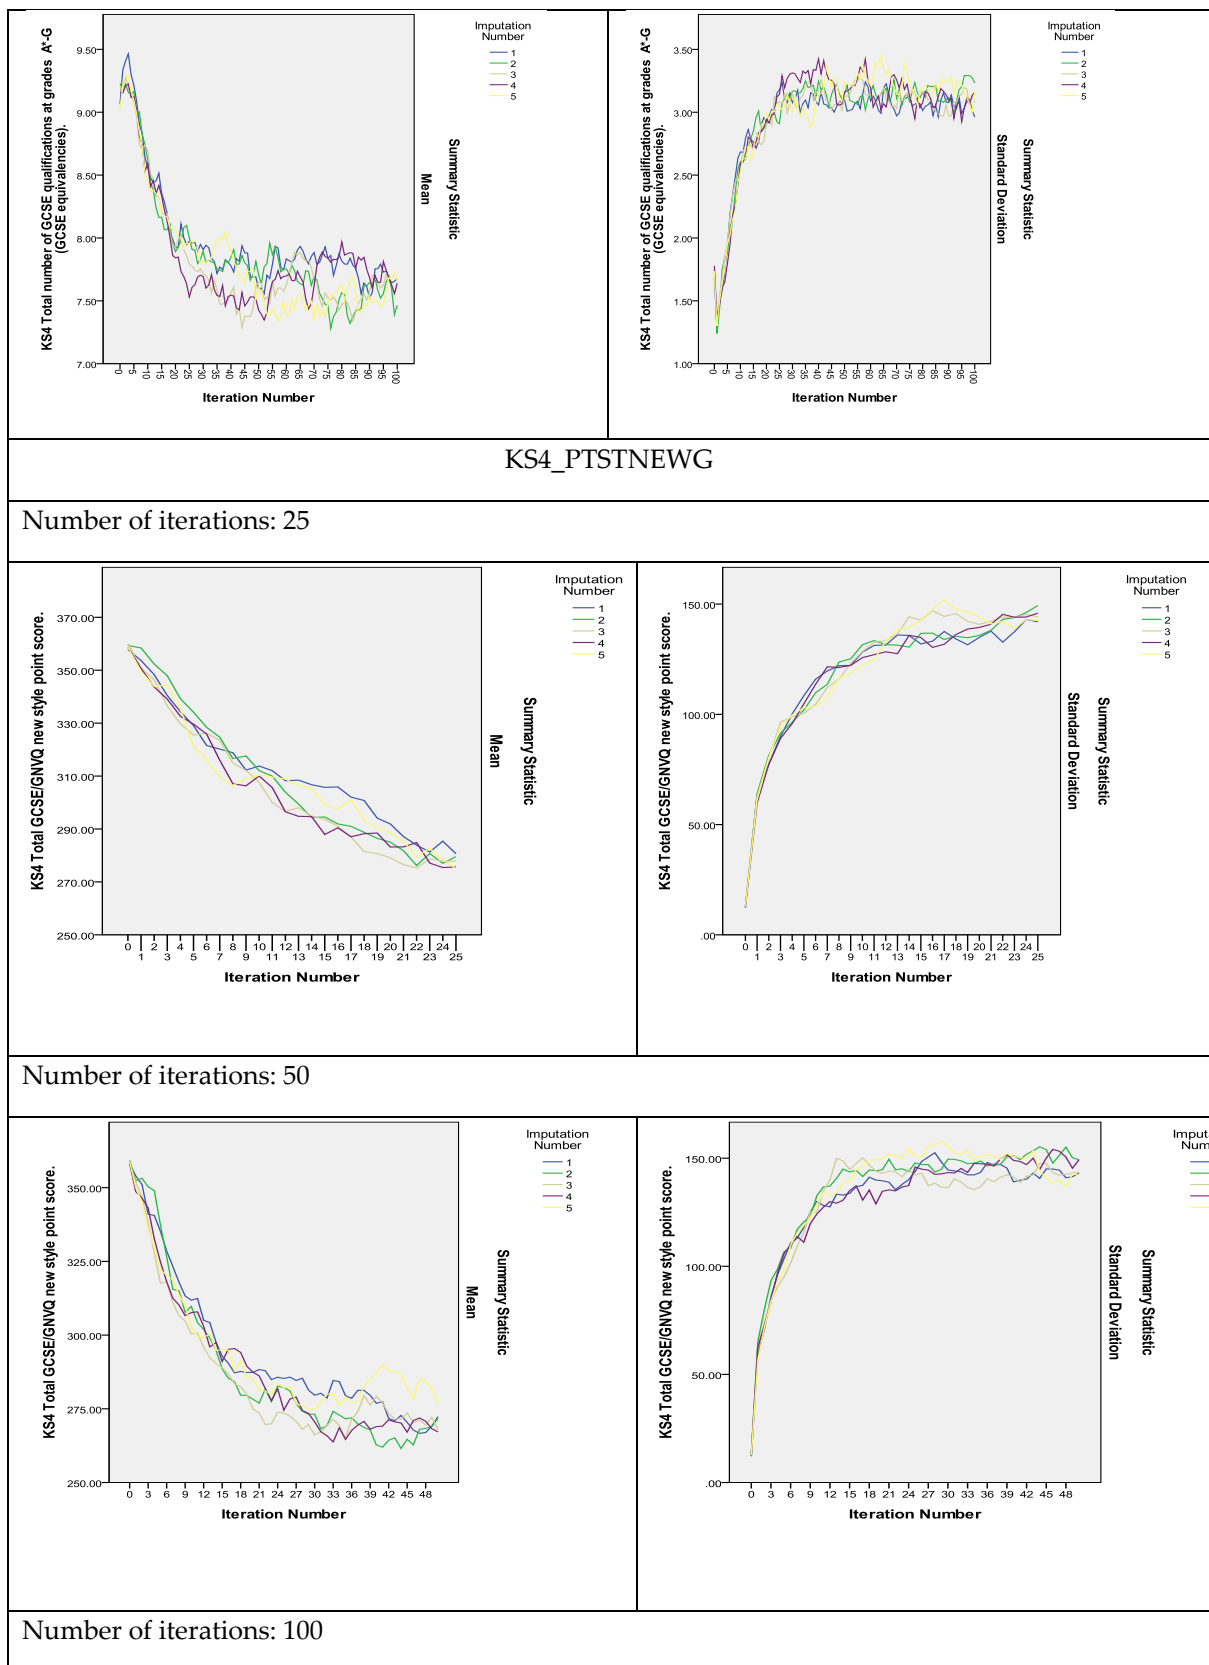

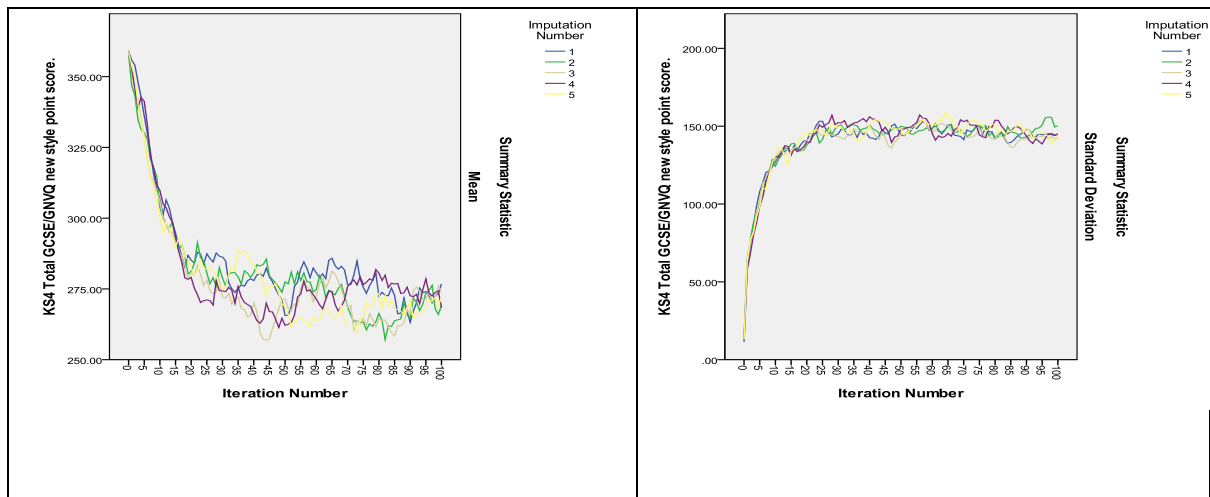

KS4\_CVAP3APS

Number of iterations: 25

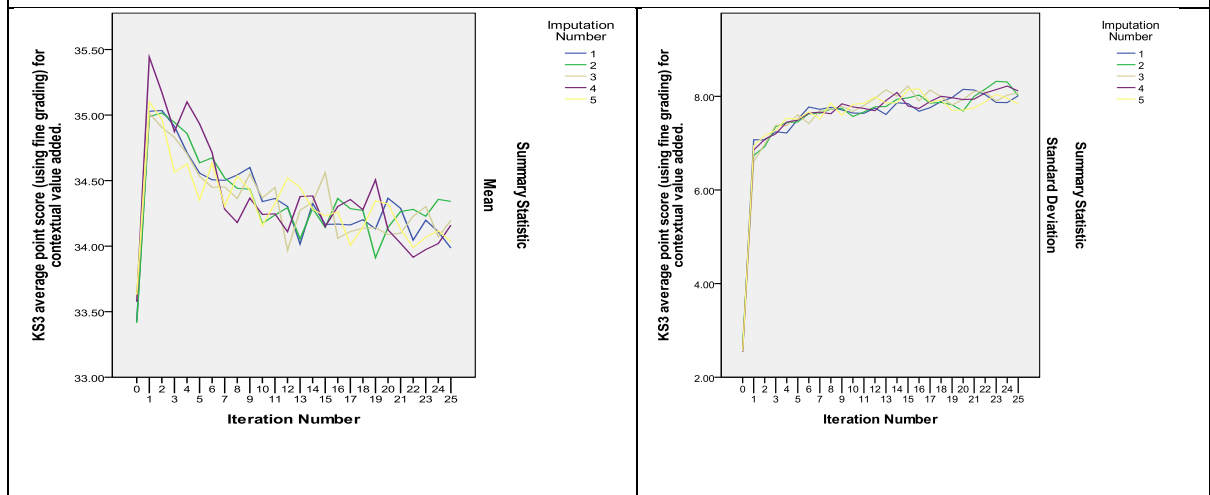

Number of iterations: 50

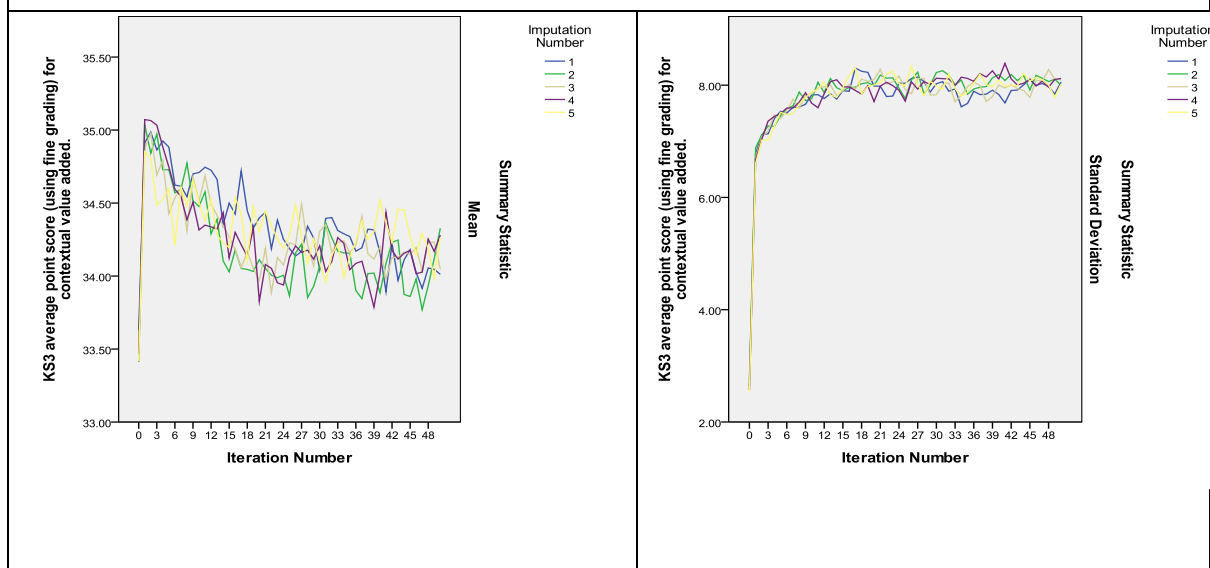

Number of iterations: 100

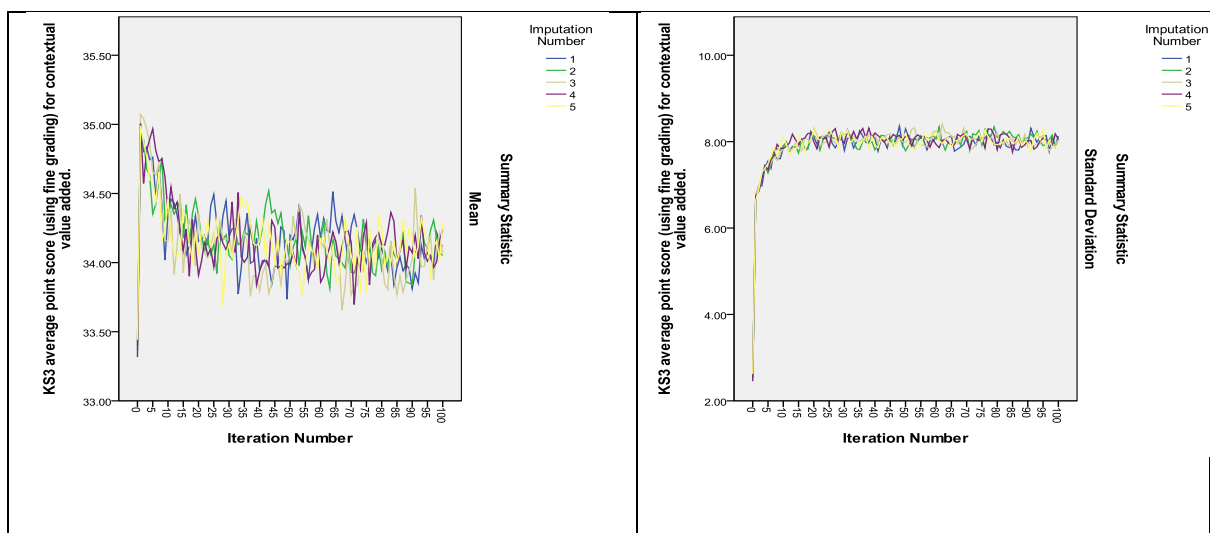

KS4\_CVAP2APS

Number of iterations: 25

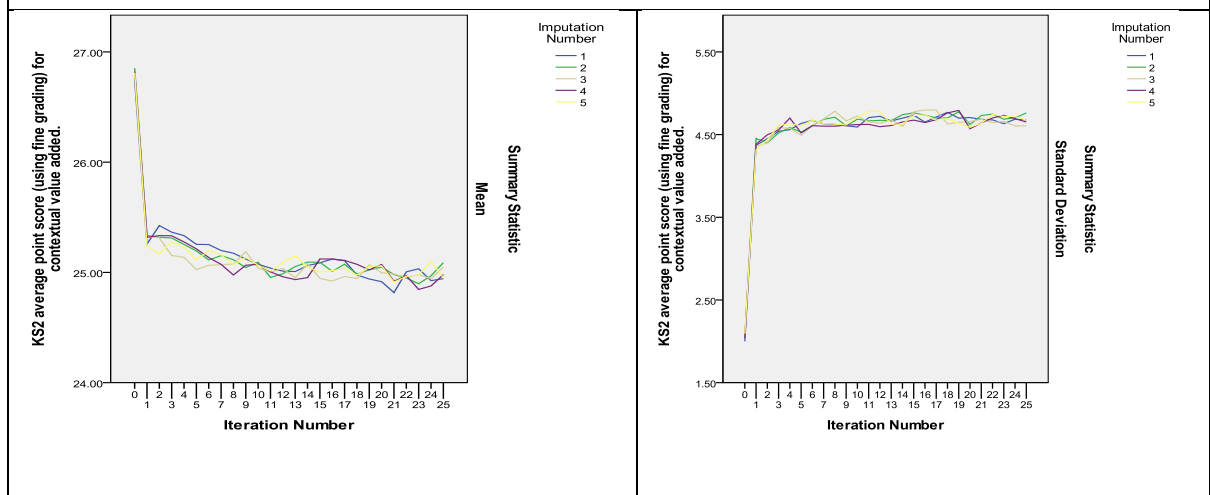

Number of iterations: 50

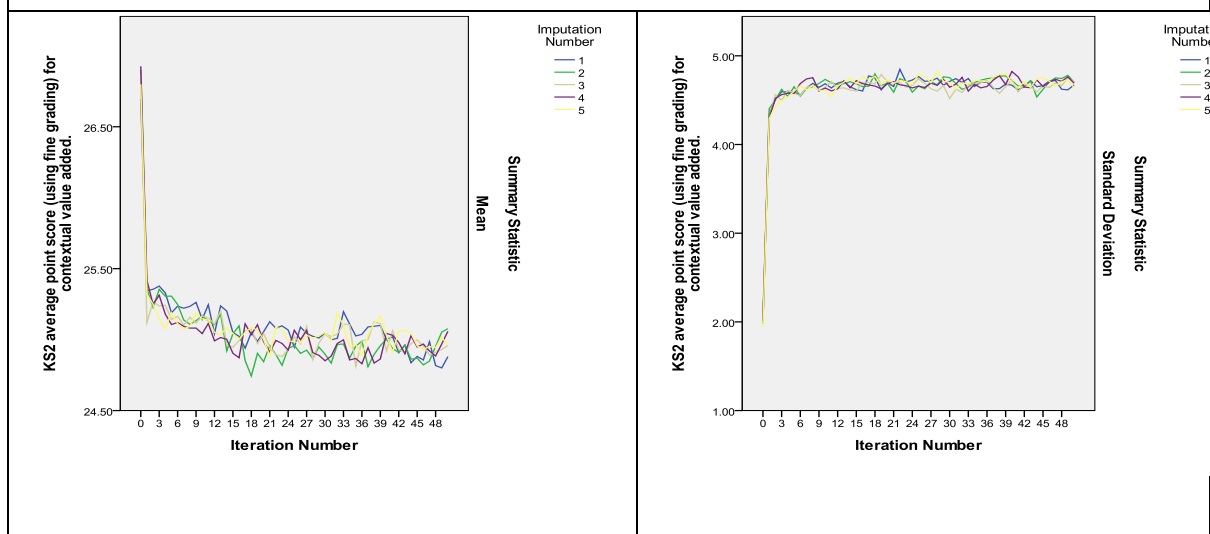

Number of iterations: 100



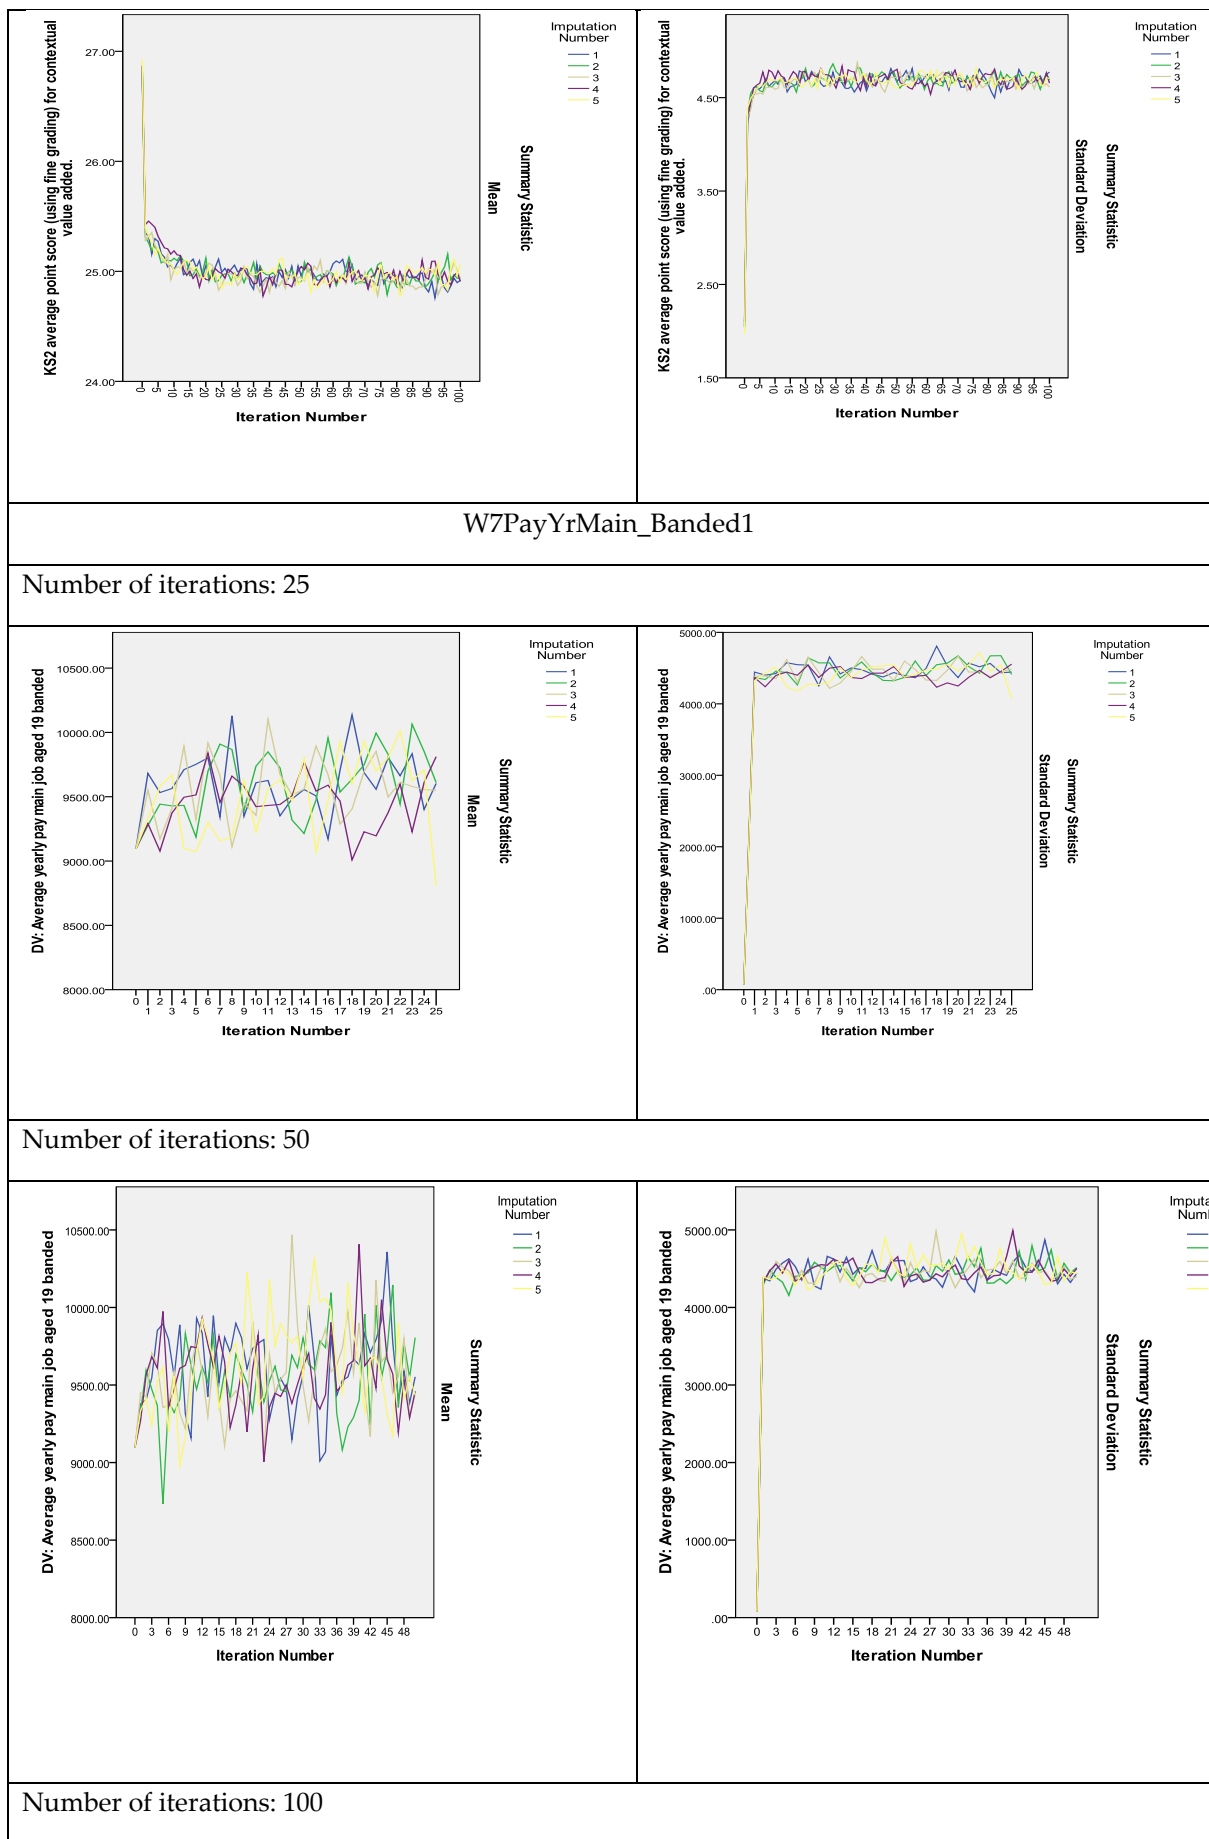

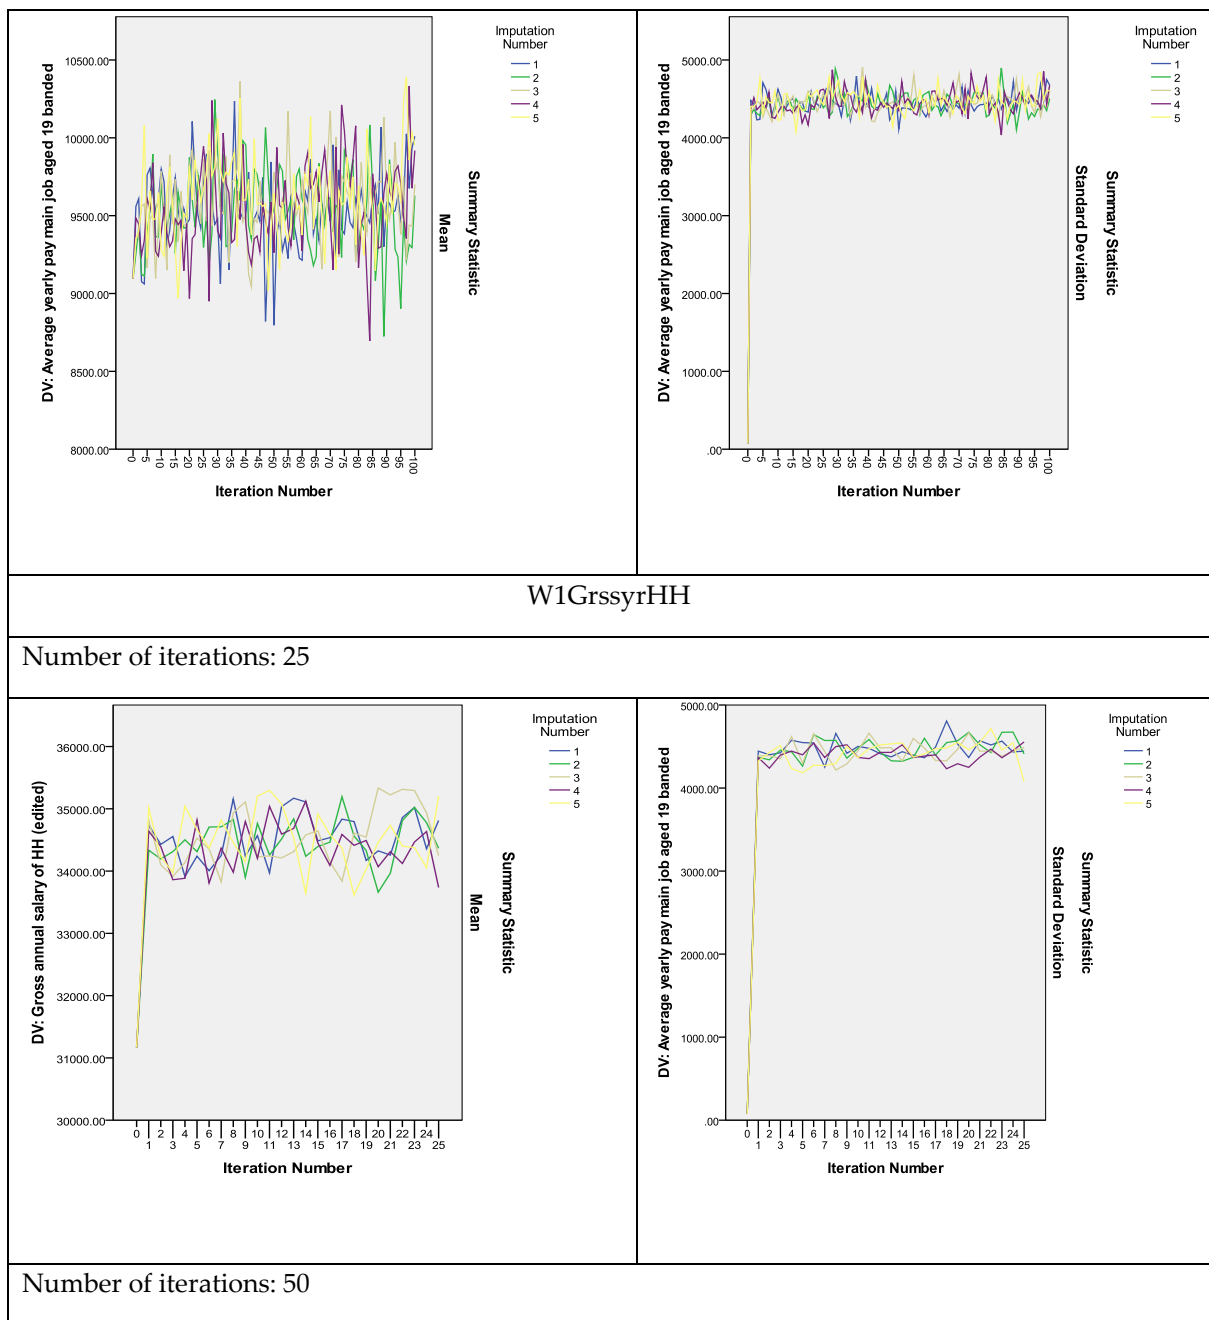

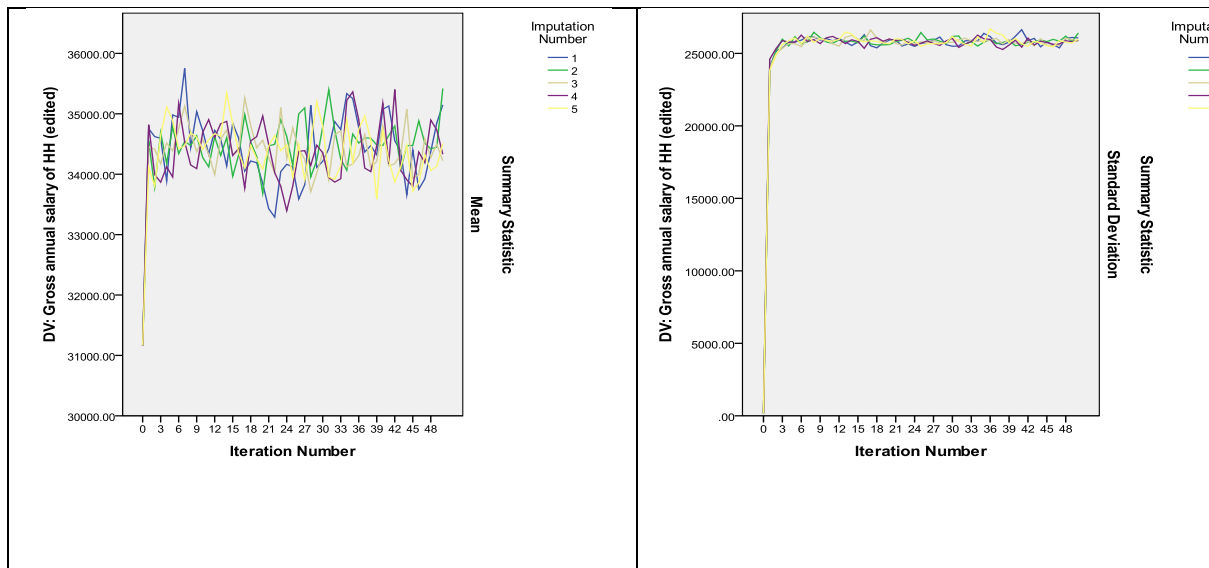

Number of iterations: 100

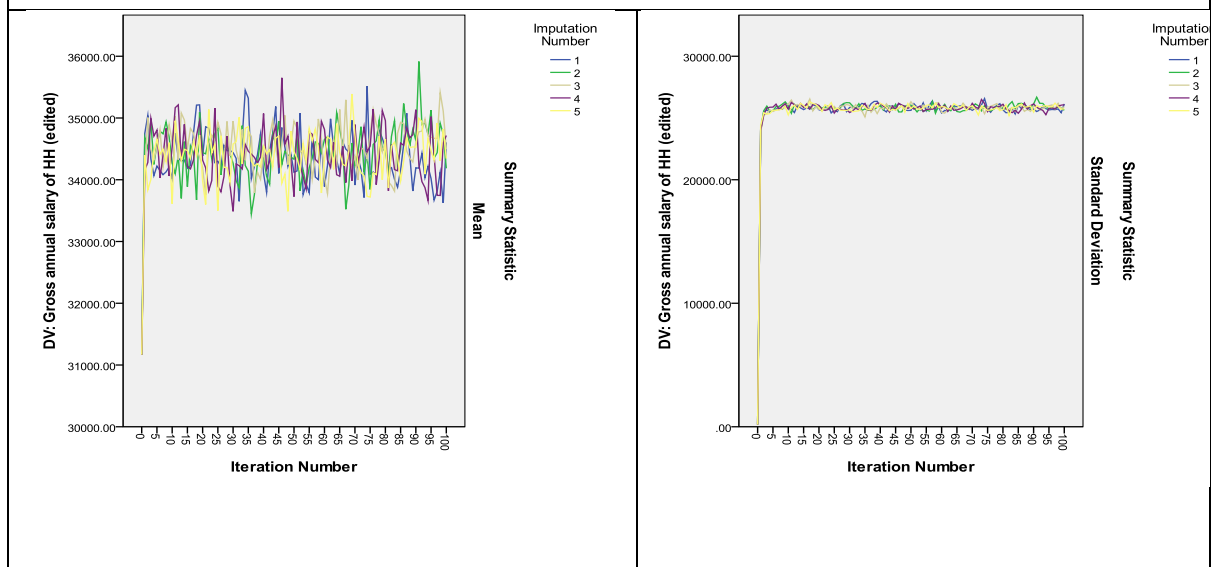

W2GrssyrHH

Number of iterations: 25

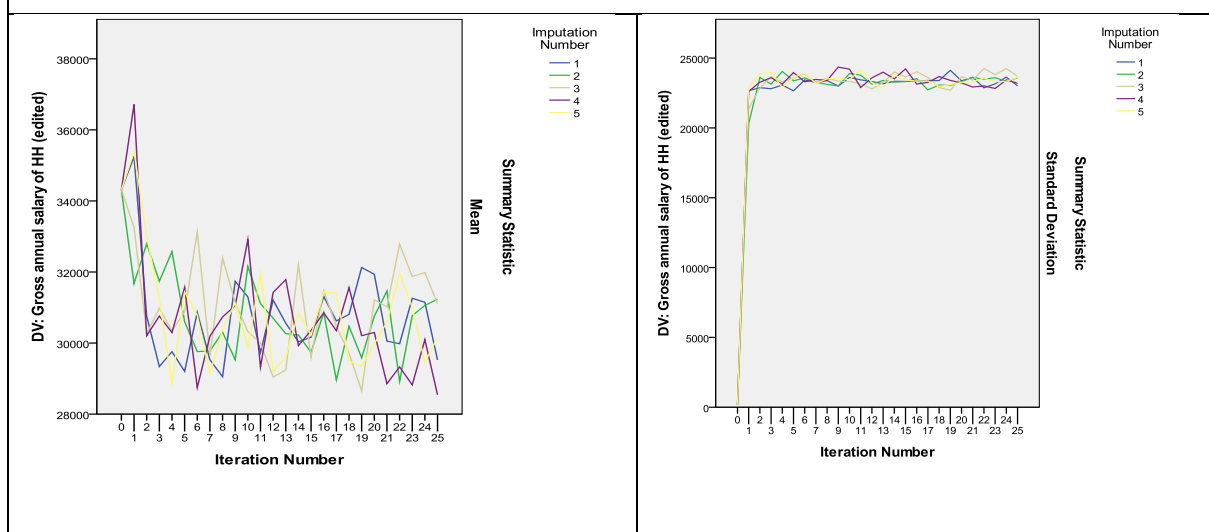

Number of iterations: 50

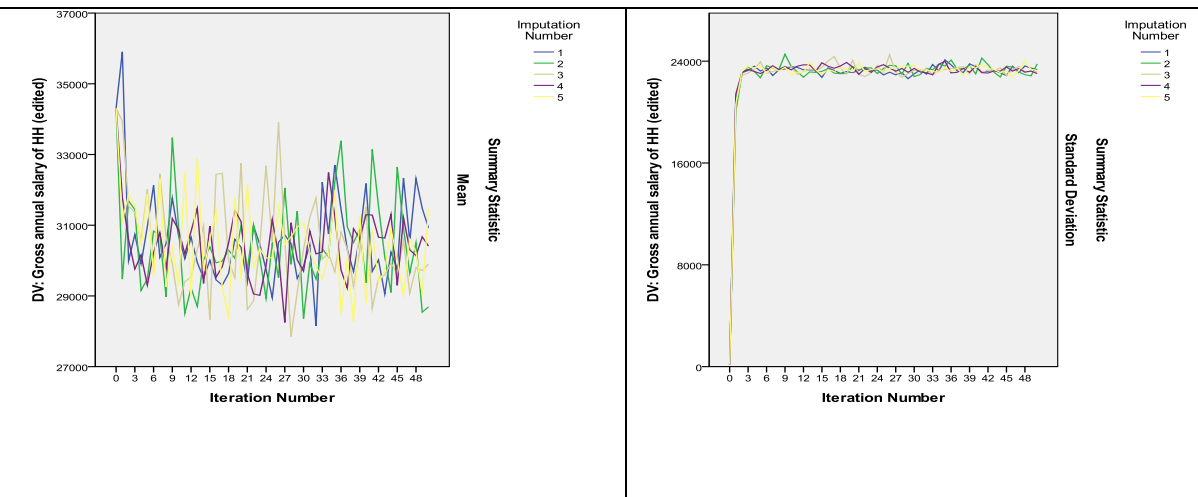

Number of iterations: 100

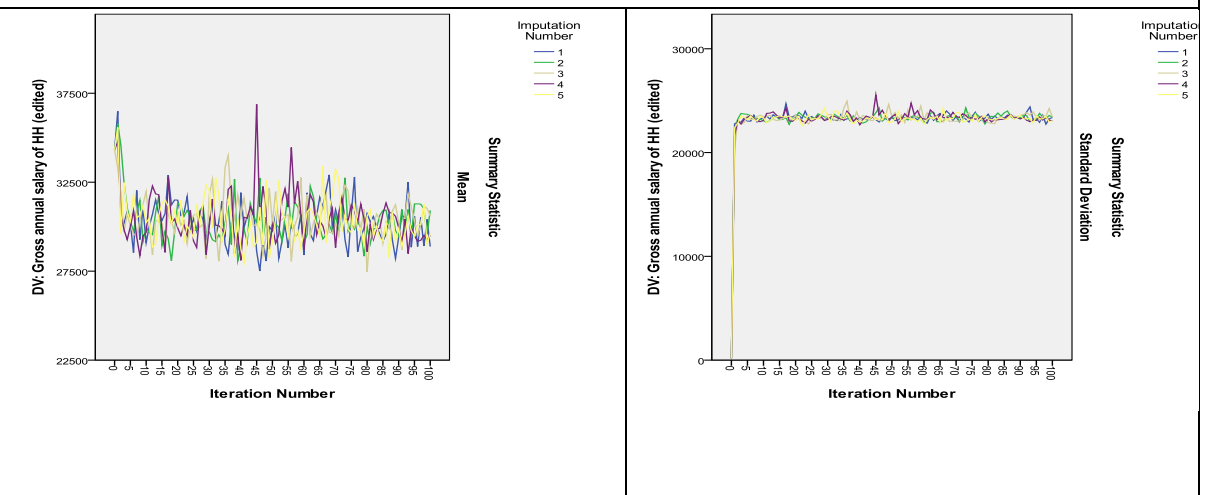

W2BenTotBand1

Number of iterations: 25

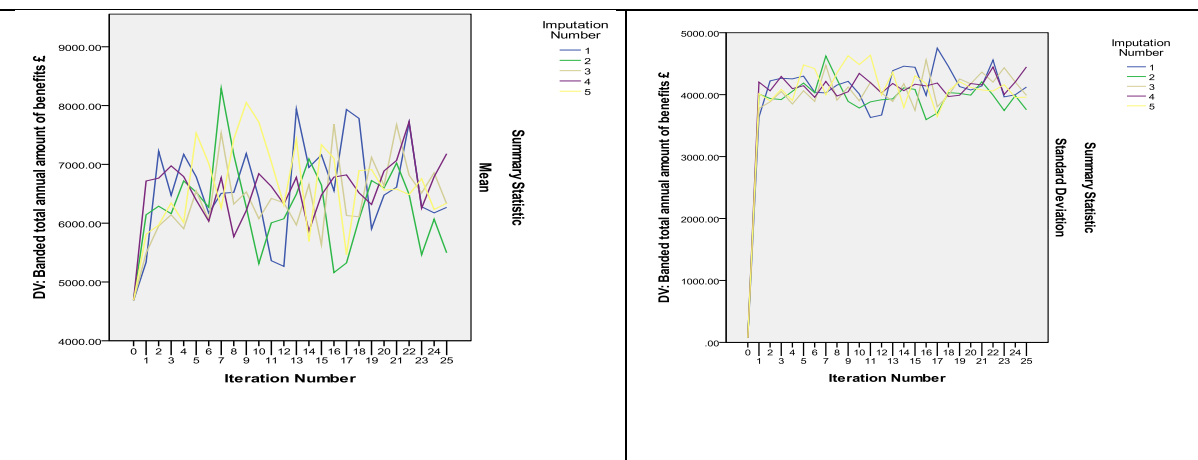

Number of iterations: 50

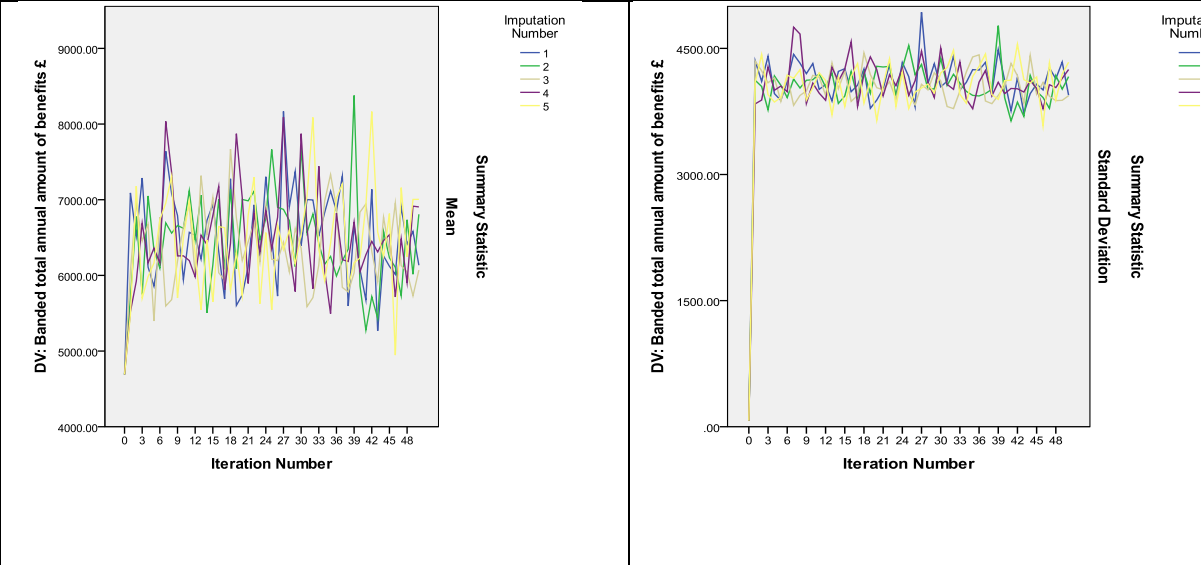

Number of iterations: 100

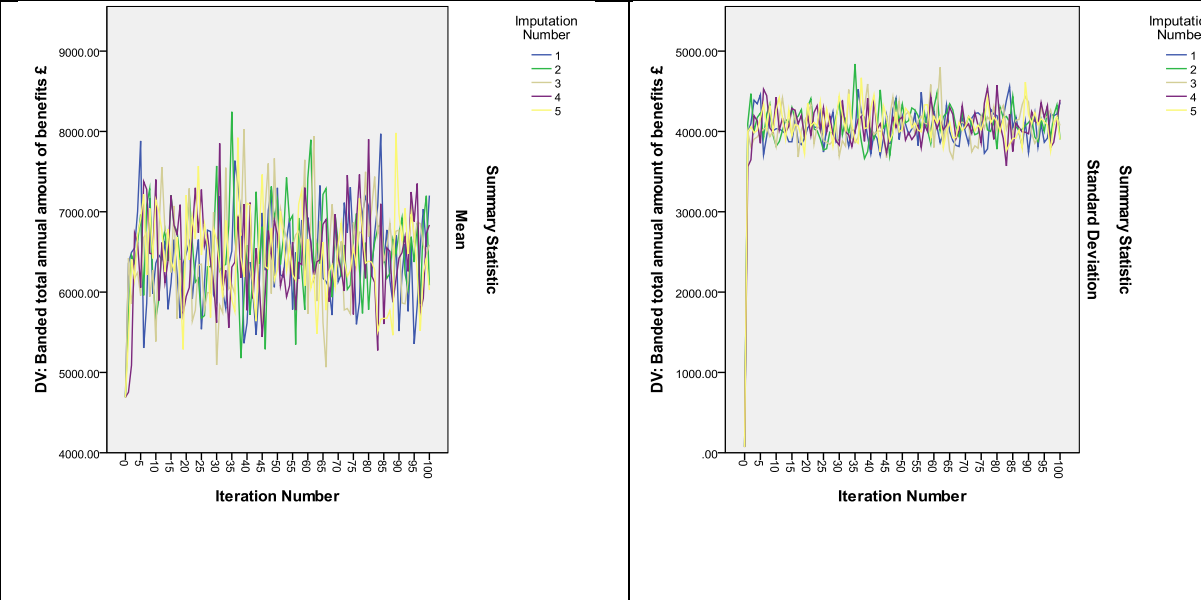

W1yschat1

Number of iterations: 25

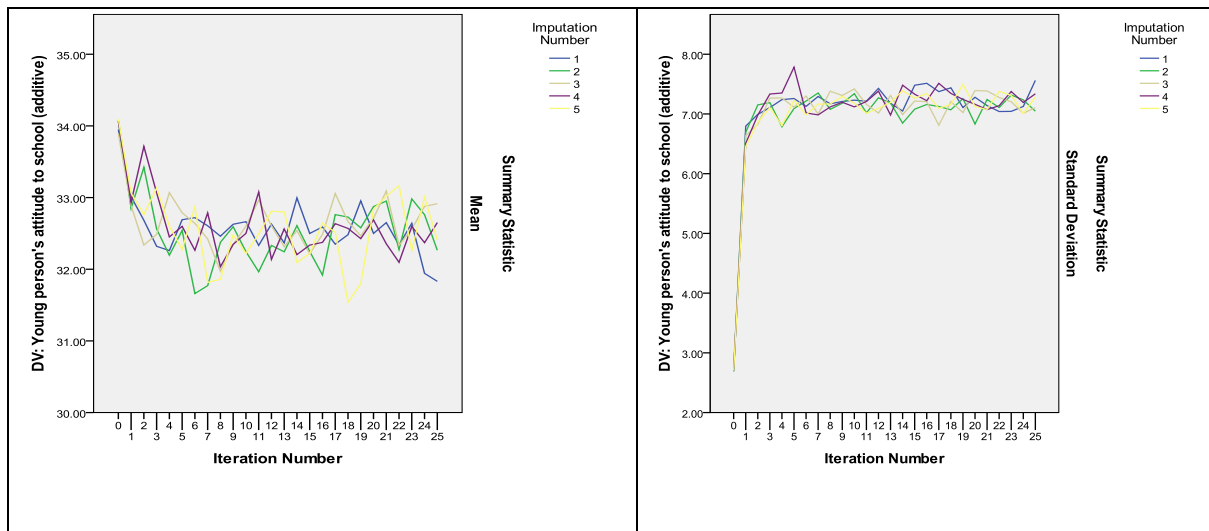

Number of iterations: 50

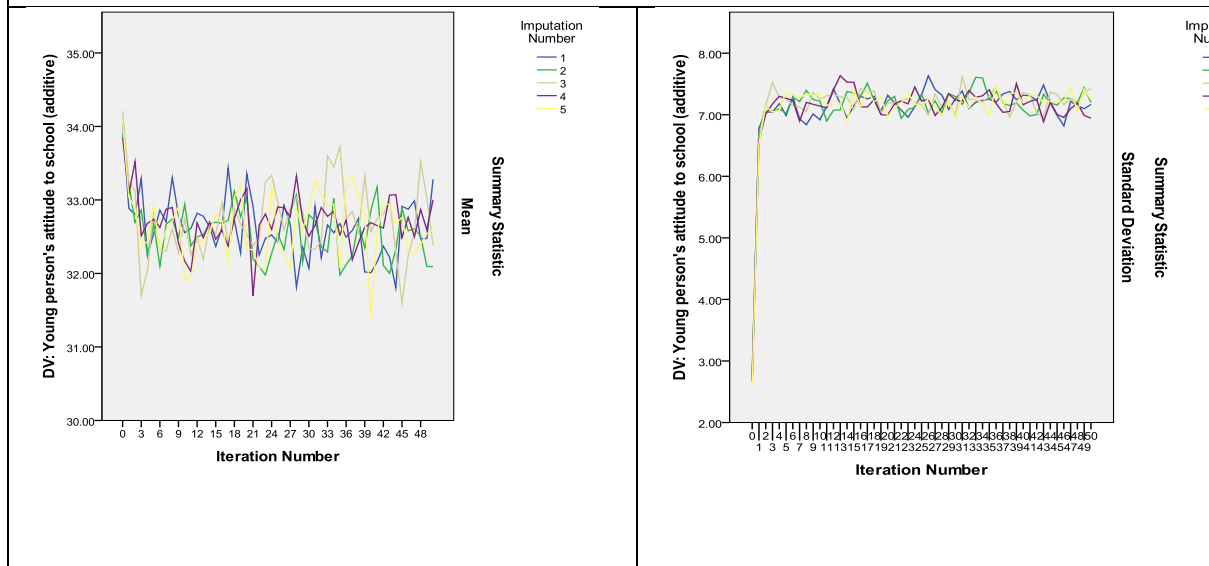

Number of iterations: 100

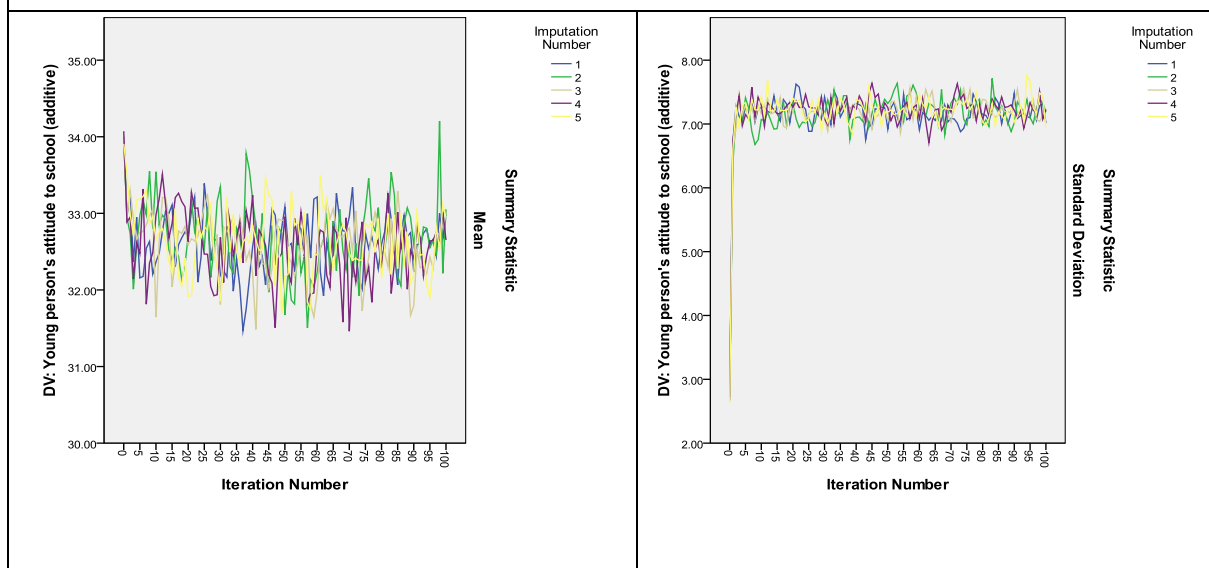

W2yschat1

Number of iterations: 25

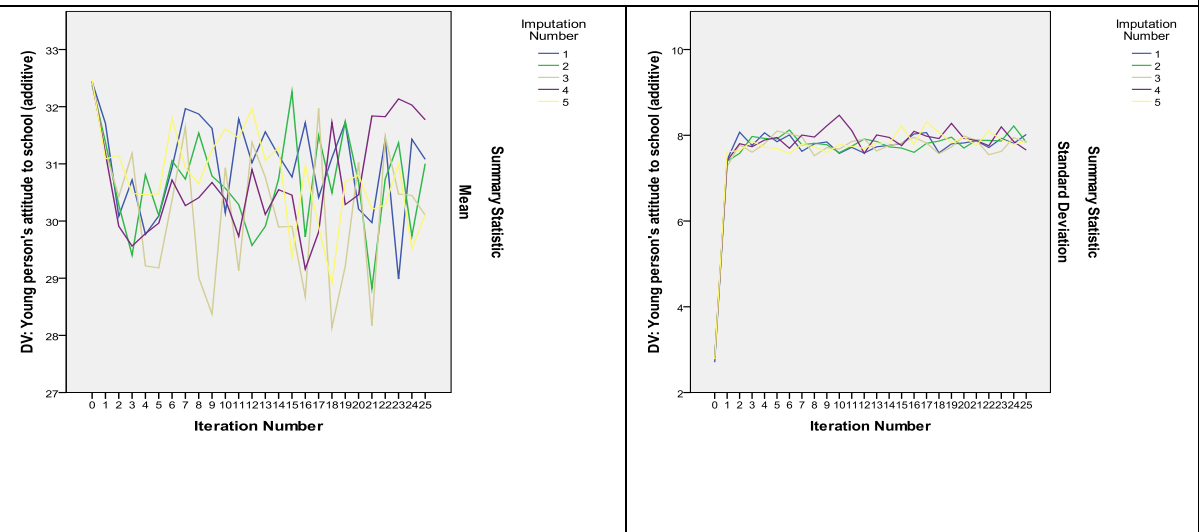

Number of iterations: 50

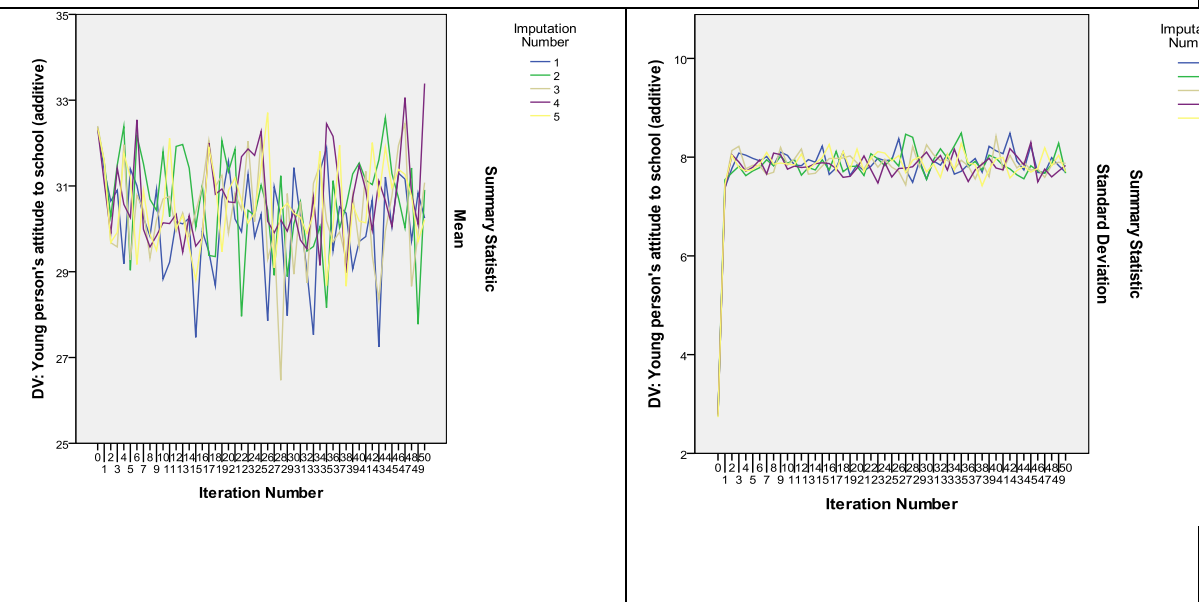

Number of iterations: 100

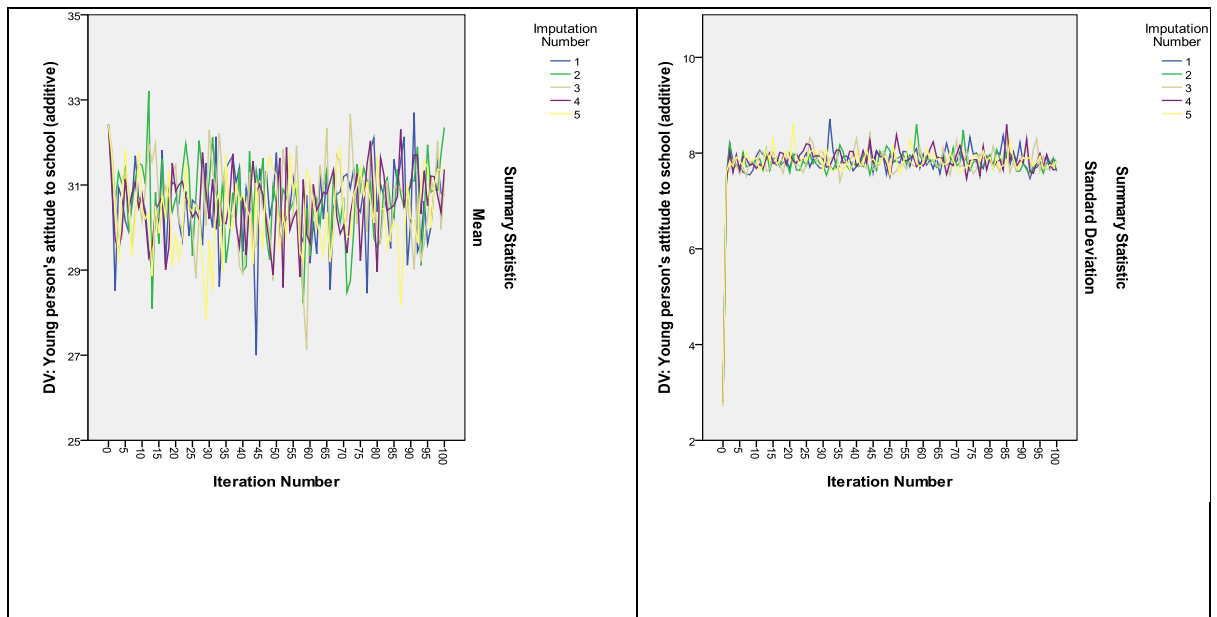

**Figure S2.** Convergence of the MI algorithm



## Kernel density plots

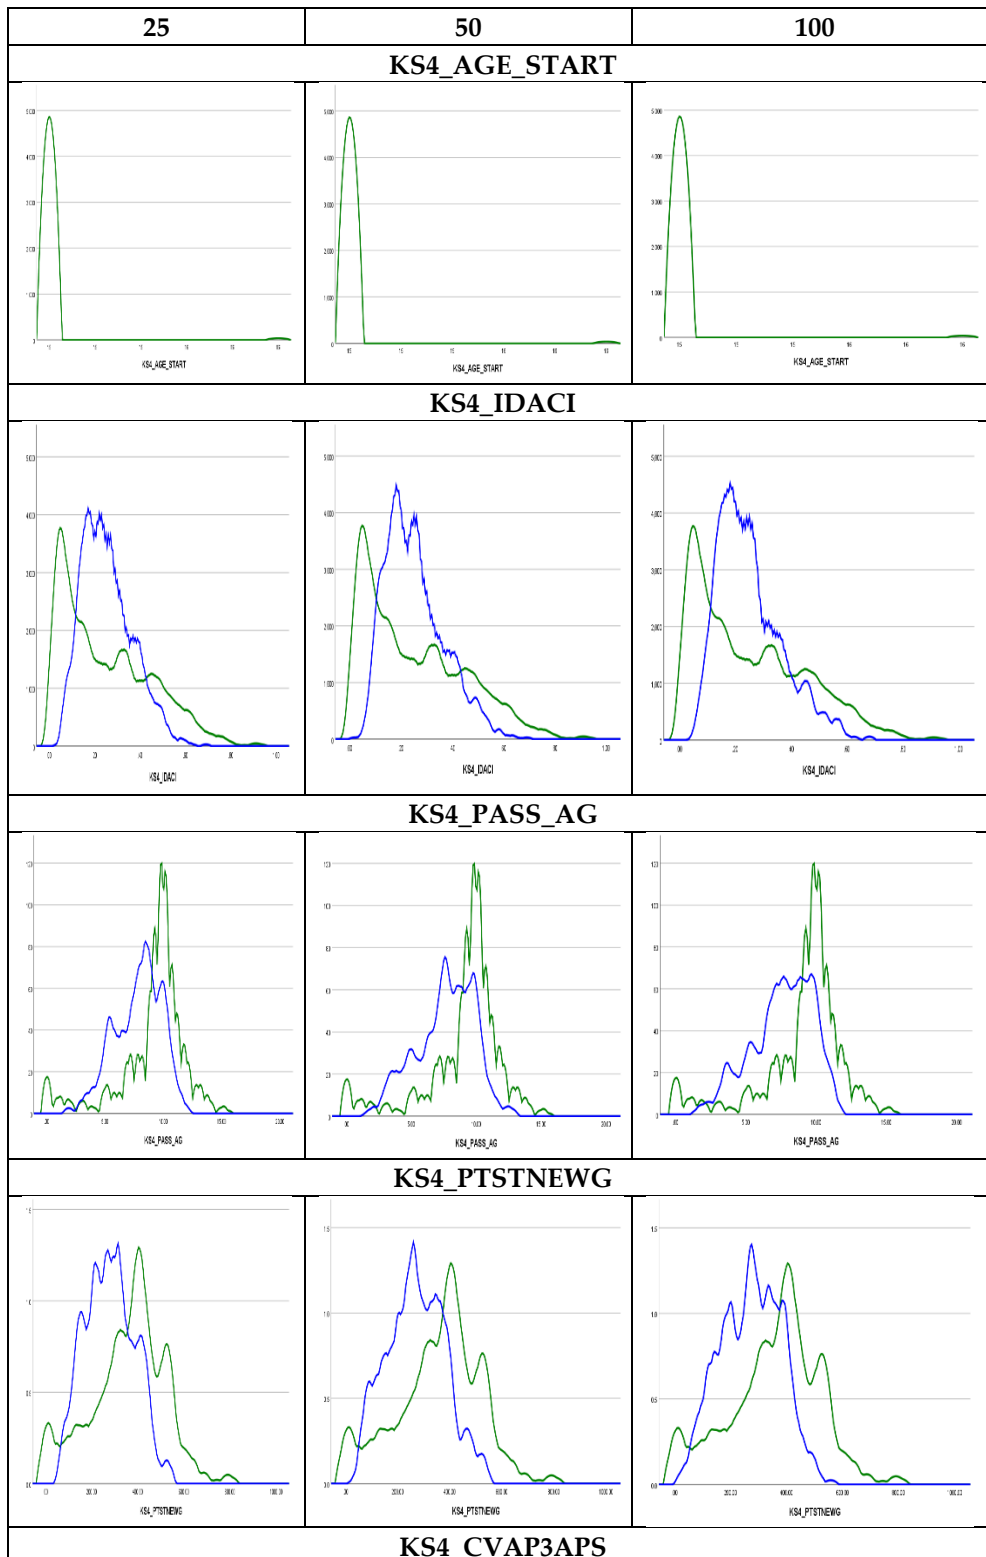

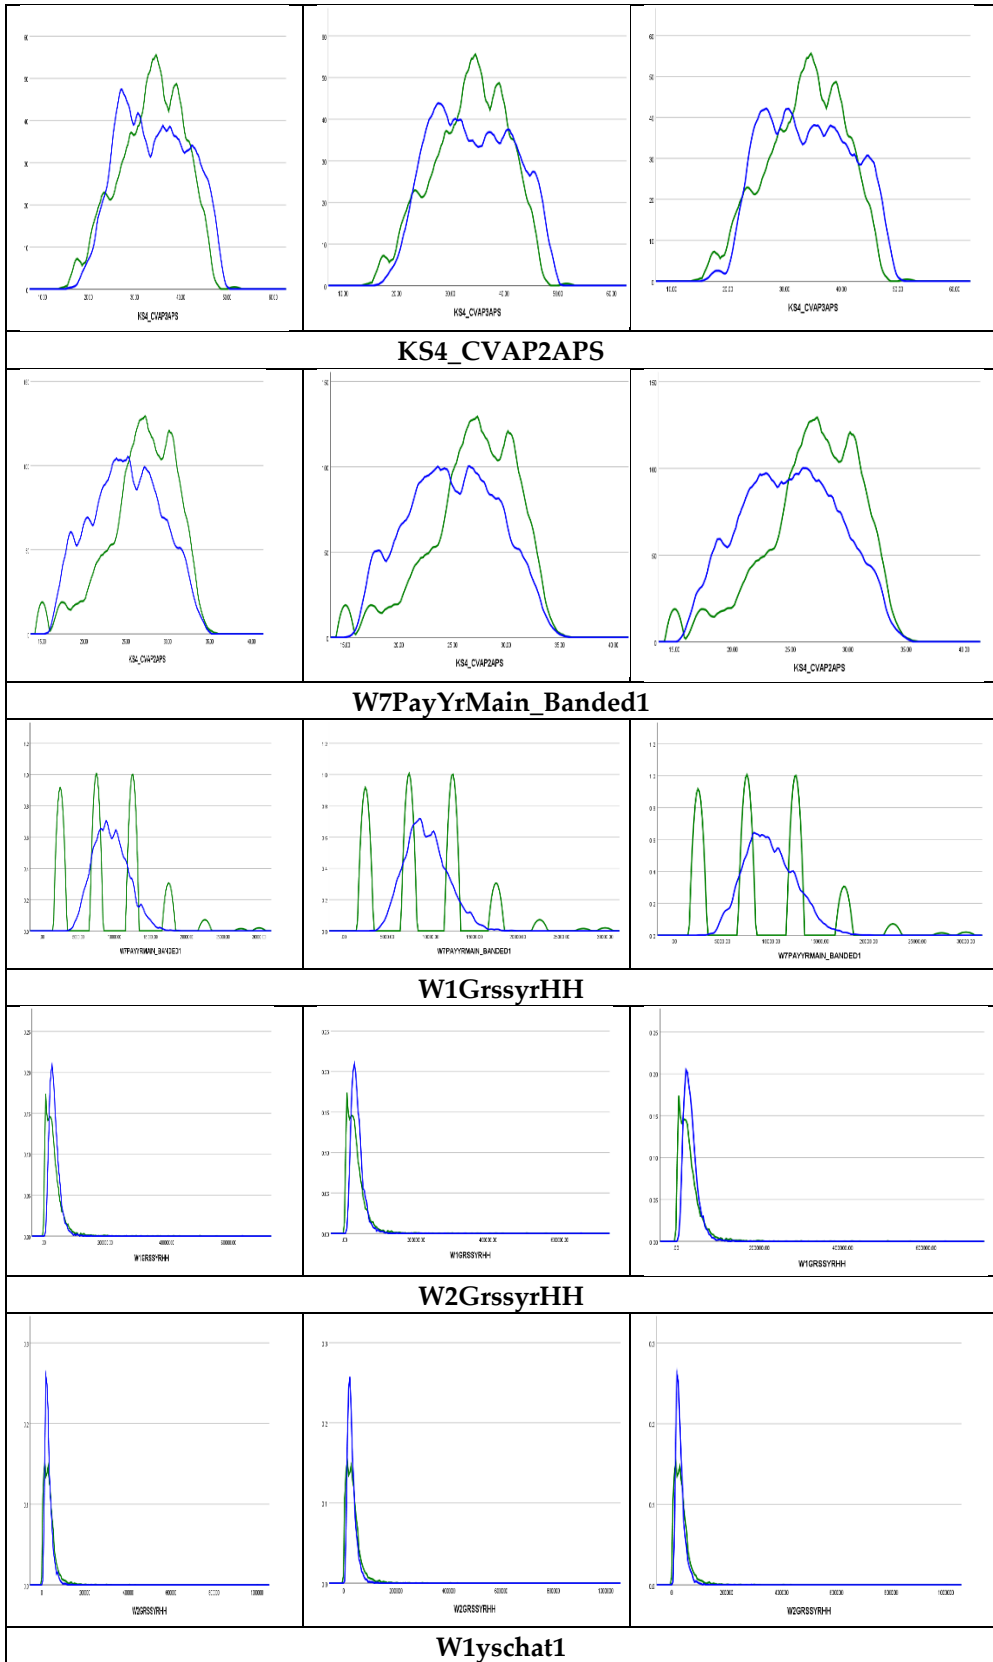

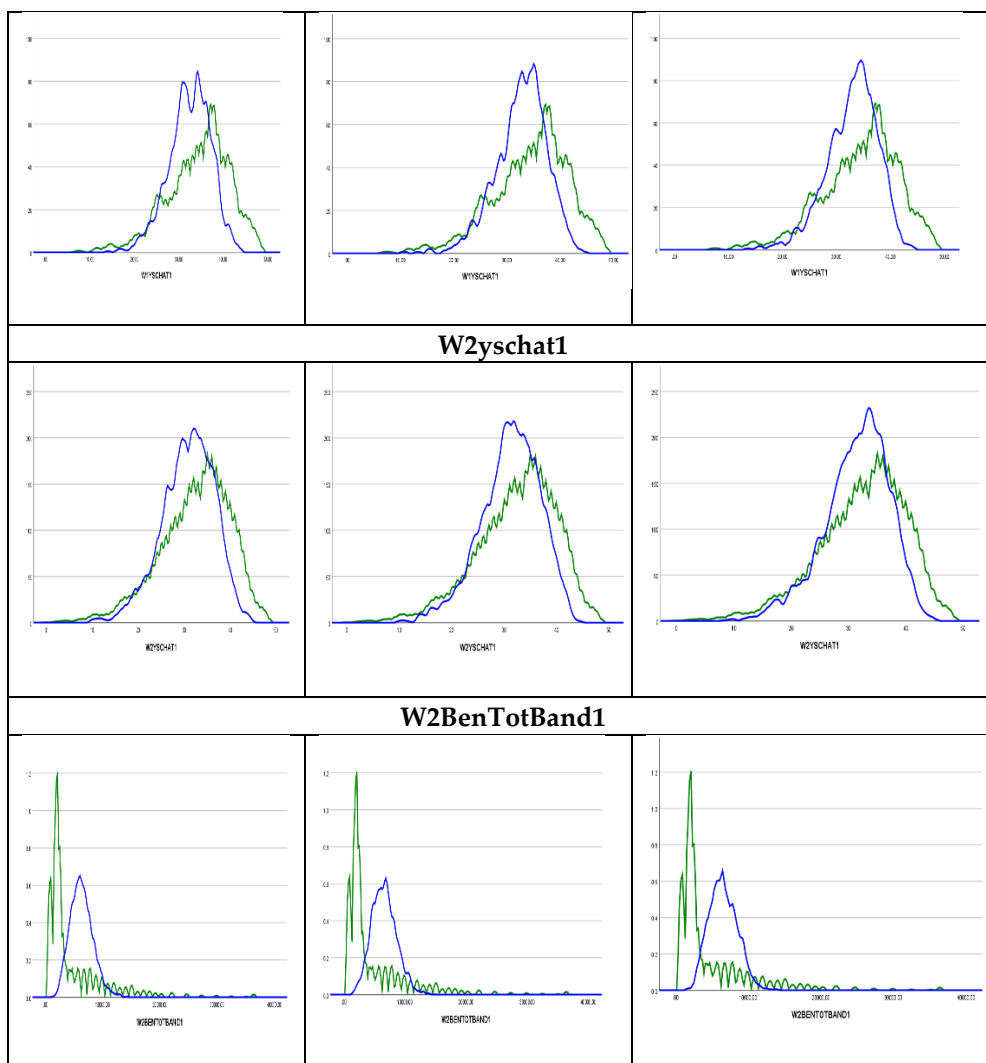

**Figure S3.** Kernel density plots. Observed values are presented by the green curve and the imputed values are presented by blue curve.

## Kolmogorov-Smirnov (KS) tests

**Table S2.** Kolmogorov-Smirnov (KS) test p-values at 10%, 5% and 1% significance levels.

| Variable/iterations        | 25       |         | 50       |         | 100      |         |
|----------------------------|----------|---------|----------|---------|----------|---------|
|                            | Observed | Imputed | Observed | Imputed | Observed | Imputed |
| <b>KS4_AGE_START</b>       |          |         |          |         |          |         |
| 10%                        | 0.000    | 0.200   | 0.000    | 0.165   | 0.000    | 0.162   |
| 5%                         | 0.000    | 0.200   | 0.000    | 0.165   | 0.000    | 0.162   |
| 1%                         | 0.000    | 0.200   | 0.000    | 0.165   | 0.000    | 0.162   |
| <b>KS4_IDACI</b>           |          |         |          |         |          |         |
| 10%                        | 0.000    | 0.000   | 0.000    | 0.000   | 0.000    | 0.000   |
| 5%                         | 0.000    | 0.000   | 0.000    | 0.000   | 0.000    | 0.000   |
| 1%                         | 0.000    | 0.000   | 0.000    | 0.000   | 0.000    | 0.000   |
| <b>KS4_PASS_AG</b>         |          |         |          |         |          |         |
| 10%                        | 0.000    | 0.000   | 0.000    | 0.000   | 0.000    | 0.000   |
| 5%                         | 0.000    | 0.000   | 0.000    | 0.000   | 0.000    | 0.000   |
| 1%                         | 0.000    | 0.000   | 0.000    | 0.000   | 0.000    | 0.000   |
| <b>KS4_PTSTNEWG</b>        |          |         |          |         |          |         |
| 10%                        | 0.000    | 0.098   | 0.000    | 0.098   | 0.000    | 0.0846  |
| 5%                         | 0.000    | 0.098   | 0.000    | 0.098   | 0.000    | 0.0846  |
| 1%                         | 0.000    | 0.098   | 0.000    | 0.098   | 0.000    | 0.0846  |
| <b>KS4_CVAP3APS</b>        |          |         |          |         |          |         |
| 10%                        | 0.000    | 0.000   | 0.000    | 0.000   | 0.000    | 0.000   |
| 5%                         | 0.000    | 0.000   | 0.000    | 0.000   | 0.000    | 0.000   |
| 1%                         | 0.000    | 0.000   | 0.000    | 0.000   | 0.000    | 0.000   |
| <b>KS4_CVAP2APS</b>        |          |         |          |         |          |         |
| 10%                        | 0.000    | 0.000   | 0.000    | 0.000   | 0.000    | 0.0006  |
| 5%                         | 0.000    | 0.000   | 0.000    | 0.000   | 0.000    | 0.0006  |
| 1%                         | 0.000    | 0.000   | 0.000    | 0.000   | 0.000    | 0.0006  |
| <b>W7PayYrMain_Banded1</b> |          |         |          |         |          |         |
| 10%                        | 0.000    | 0.000   | 0.000    | 0.000   | 0.000    | 0.000   |
| 5%                         | 0.000    | 0.000   | 0.000    | 0.000   | 0.000    | 0.000   |
| 1%                         | 0.000    | 0.000   | 0.000    | 0.000   | 0.000    | 0.000   |
| <b>W1GrssyrHH</b>          |          |         |          |         |          |         |
| 10%                        | 0.000    | 0.000   | 0.000    | 0.000   | 0.000    | 0.000   |
| 5%                         | 0.000    | 0.000   | 0.000    | 0.000   | 0.000    | 0.000   |
| 1%                         | 0.000    | 0.000   | 0.000    | 0.000   | 0.000    | 0.000   |
| <b>W2GrssyrHH</b>          |          |         |          |         |          |         |
| 10%                        | 0.000    | 0.000   | 0.000    | 0.000   | 0.000    | 0.000   |
| 5%                         | 0.000    | 0.000   | 0.000    | 0.000   | 0.000    | 0.000   |
| 1%                         | 0.000    | 0.000   | 0.000    | 0.000   | 0.000    | 0.000   |
| <b>W1yschat1</b>           |          |         |          |         |          |         |
| 10%                        | 0.000    | 0.021   | 0.000    | 0.039   | 0.000    | 0.0178  |
| 5%                         | 0.000    | 0.021   | 0.000    | 0.039   | 0.000    | 0.0178  |
| 1%                         | 0.000    | 0.021   | 0.000    | 0.039   | 0.000    | 0.0178  |
| <b>W2yschat1</b>           |          |         |          |         |          |         |
| 10%                        | 0.000    | 0.002   | 0.000    | 0.007   | 0.000    | 0.0008  |
| 5%                         | 0.000    | 0.002   | 0.000    | 0.005   | 0.000    | 0.0008  |

|                      |       |       |       |       |       |        |
|----------------------|-------|-------|-------|-------|-------|--------|
| <b>1%</b>            | 0.000 | 0.002 | 0.000 | 0.005 | 0.000 | 0.0008 |
| <b>W2BenTotBand1</b> |       |       |       |       |       |        |
| <b>10%</b>           | 0.000 | 0.000 | 0.000 | 0.000 | 0.000 | 0.000  |
| <b>5%</b>            | 0.000 | 0.000 | 0.000 | 0.000 | 0.000 | 0.000  |
| <b>1%</b>            | 0.000 | 0.000 | 0.000 | 0.000 | 0.000 | 0.000  |

## Absolute difference of means between observed and imputed data

**Table S3.** Absolute difference of means between observed and imputed data

| <b>Variable Name/iterations</b> | <b>Absolute difference in means</b> | <b>2 standard deviations (25)</b> | <b>2 standard deviations (50)</b> | <b>2 standard deviations (100)</b> |
|---------------------------------|-------------------------------------|-----------------------------------|-----------------------------------|------------------------------------|
| <b>KS4_AGE_START</b>            | 0.000                               | 0.992                             | 0.992                             | 0.992                              |
| <b>KS4_IDACI</b>                | 0.008                               | 1.676                             | 1.678                             | 1.682                              |
| <b>KS4_PASS_AG</b>              | 1.278                               | 6.915                             | 6.961                             | 6.965                              |
| <b>KS4_PTSTNEWG</b>             | 81.211                              | 49.311                            | 49.365                            | 49.346                             |
| <b>KS4_CVAP3APS</b>             | 0.641                               | 10.868                            | 10.886                            | 10.882                             |
| <b>KS4_CVAP2APS</b>             | 1.849                               | 8.386                             | 8.390                             | 8.392                              |
| <b>W7PayYrMain_Banded1</b>      | 381.176                             | 281.911                           | 282.786                           | 284.969                            |
| <b>W1GrssyrHH</b>               | 3307.491                            | 675.833                           | 676.990                           | 676.160                            |
| <b>W2GrssyrHH</b>               | 4197.773                            | 656.329                           | 655.701                           | 655.478                            |
| <b>W2BenTotBand1</b>            | 1632.950                            | 273.261                           | 274.299                           | 274.307                            |
| <b>W1yschat1</b>                | 1.632                               | 10.796                            | 10.770                            | 10.728                             |
| <b>W2yschat1</b>                | 1.582                               | 11.116                            | 11.085                            | 11.082                             |

## Ratios of variances

**Table S4.** Ratios of variances of observed and imputed data

| Variable Name/iterations | 25    | 50    | 100   |
|--------------------------|-------|-------|-------|
| KS4_AGE_START            | 1.050 | 1.050 | 1.050 |
| KS4_IDACI                | 1.201 | 1.195 | 1.183 |
| KS4_PASS_AG              | 0.971 | 0.946 | 0.944 |
| KS4_PTSTNEWG             | 1.099 | 1.094 | 1.096 |
| KS4_CVAP3APS             | 0.843 | 0.838 | 0.839 |
| KS4_CVAP2APS             | 0.881 | 0.879 | 0.878 |
| W7PayYrMain_Banded1      | 1.260 | 1.243 | 1.201 |
| W1GrssyrHH               | 1.209 | 1.200 | 1.207 |
| W2GrssyrHH               | 1.299 | 1.305 | 1.307 |
| W2BenTotBand1            | 1.302 | 1.280 | 1.279 |
| W1yschat1                | 1.005 | 1.015 | 1.031 |
| W2yschat1                | 0.970 | 0.980 | 0.981 |

# **P-values of t-tests of means differences between observed and pooled imputed values**

**Table S5.** P-values of t-tests of means differences between observed and pooled imputed values +

| <b>Variable/iterations/significance level</b> | <b>25</b> | <b>50</b> | <b>100</b> |
|-----------------------------------------------|-----------|-----------|------------|
| <b>KS4_AGE_START</b>                          |           |           |            |
| <b>10%</b>                                    | 0.000     | 0.000     | 0.000      |
| <b>5%</b>                                     | 0.000     | 0.000     | 0.000      |
| <b>1%</b>                                     | 0.000     | 0.000     | 0.000      |
| <b>KS4_IDACI</b>                              |           |           |            |
| <b>10%</b>                                    | 0.000     | 0.000     | 0.003      |
| <b>5%</b>                                     | 0.000     | 0.000     | 0.003      |
| <b>1%</b>                                     | 0.000     | 0.000     | 0.003      |
| <b>KS4_PASS_AG</b>                            |           |           |            |
| <b>10%</b>                                    | 0.000     | 0.000     | 0.000      |
| <b>5%</b>                                     | 0.000     | 0.000     | 0.000      |
| <b>1%</b>                                     | 0.000     | 0.000     | 0.000      |
| <b>KS4_PTSTNEWG</b>                           |           |           |            |
| <b>10%</b>                                    | 0.000     | 0.000     | 0.000      |
| <b>5%</b>                                     | 0.000     | 0.000     | 0.000      |
| <b>1%</b>                                     | 0.000     | 0.000     | 0.000      |
| <b>KS4_CVAP3APS</b>                           |           |           |            |
| <b>10%</b>                                    | 0.000     | 0.000     | 0.000      |
| <b>5%</b>                                     | 0.000     | 0.000     | 0.000      |
| <b>1%</b>                                     | 0.000     | 0.000     | 0.000      |
| <b>KS4_CVAP2APS</b>                           |           |           |            |
| <b>10%</b>                                    | 0.000     | 0.000     | 0.000      |
| <b>5%</b>                                     | 0.000     | 0.000     | 0.000      |
| <b>1%</b>                                     | 0.000     | 0.000     | 0.000      |
| <b>W7PayYrMain_Banded1</b>                    |           |           |            |
| <b>10%</b>                                    | 0.000     | 0.000     | 0.000      |
| <b>5%</b>                                     | 0.000     | 0.000     | 0.000      |
| <b>1%</b>                                     | 0.000     | 0.000     | 0.000      |
| <b>W1GrssyrHH</b>                             |           |           |            |
| <b>10%</b>                                    | 0.000     | 0.000     | 0.000      |
| <b>5%</b>                                     | 0.000     | 0.000     | 0.000      |
| <b>1%</b>                                     | 0.000     | 0.000     | 0.000      |
| <b>W2GrssyrHH</b>                             |           |           |            |
| <b>10%</b>                                    | 0.000     | 0.000     | 0.000      |
| <b>5%</b>                                     | 0.000     | 0.000     | 0.000      |
| <b>1%</b>                                     | 0.000     | 0.000     | 0.000      |
| <b>W1yschat1</b>                              |           |           |            |



|                      |       |       |       |
|----------------------|-------|-------|-------|
| <b>10%</b>           | 0.000 | 0.000 | 0.000 |
| <b>5%</b>            | 0.000 | 0.000 | 0.000 |
| <b>1%</b>            | 0.000 | 0.000 | 0.000 |
| <b>W2yschat1</b>     |       |       |       |
| <b>10%</b>           | 0.000 | 0.000 | 0.000 |
| <b>5%</b>            | 0.000 | 0.000 | 0.000 |
| <b>1%</b>            | 0.000 | 0.000 | 0.000 |
| <b>W2BenTotBand1</b> |       |       |       |
| <b>10%</b>           | 0.000 | 0.000 | 0.000 |
| <b>5%</b>            | 0.000 | 0.000 | 0.000 |
| <b>1%</b>            | 0.000 | 0.000 | 0.000 |

+The pooled p-values are calculated using the mean of the p-values for the five imputed values.

## F-test and t-tests results

**Table S6.** F-test and t-tests p-values\*

| Variable                   | t test p-values |       |       | F test p-values |       |       |
|----------------------------|-----------------|-------|-------|-----------------|-------|-------|
| Iterations/imputation      | 25              | 50    | 100   | 25              | 50    | 100   |
| <b>KS4_AGE_START</b>       |                 |       |       |                 |       |       |
| 1                          | 0.537           | 0.537 | 0.537 | 0.069           | 0.069 | 0.069 |
| 2                          | 0.537           | 0.537 | 0.537 | 0.069           | 0.069 | 0.069 |
| 3                          | 0.537           | 0.537 | 0.537 | 0.069           | 0.069 | 0.069 |
| 4                          | 0.537           | 0.537 | 0.537 | 0.069           | 0.069 | 0.069 |
| 5                          | 0.537           | 0.537 | 0.537 | 0.069           | 0.069 | 0.069 |
| <b>KS4_IDACI</b>           |                 |       |       |                 |       |       |
| 1                          | 0.000           | 0.000 | 0.106 | 0.000           | 0.000 | 0.000 |
| 2                          | 0.271           | 0.22  | 0.152 | 0.000           | 0.000 | 0.000 |
| 3                          | 0.055           | 0.137 | 0.344 | 0.000           | 0.000 | 0.000 |
| 4                          | 0.958           | 0.000 | 0.521 | 0.000           | 0.000 | 0.000 |
| 5                          | 0.006           | 0.869 | 0.591 | 0.000           | 0.000 | 0.000 |
| <b>KS4_PASS_AG</b>         |                 |       |       |                 |       |       |
| 1                          | 0.000           | 0.000 | 0.000 | 0.003           | 0.000 | 0.002 |
| 2                          | 0.000           | 0.000 | 0.000 | 0.000           | 0.000 | 0.000 |
| 3                          | 0.000           | 0.000 | 0.000 | 0.001           | 0.000 | 0.000 |
| 4                          | 0.000           | 0.000 | 0.000 | 0.000           | 0.000 | 0.000 |
| 5                          | 0.000           | 0.000 | 0.000 | 0.005           | 0.001 | 0.000 |
| <b>KS4_PTSTNEWG</b>        |                 |       |       |                 |       |       |
| 1                          | 0.000           | 0.000 | 0.000 | 0.019           | 0.168 | 0.11  |
| 2                          | 0.000           | 0.000 | 0.000 | 0.965           | 0.283 | 0.427 |
| 3                          | 0.000           | 0.000 | 0.000 | 0.048           | 0.073 | 0.172 |
| 4                          | 0.000           | 0.000 | 0.000 | 0.096           | 0.649 | 0.23  |
| 5                          | 0.000           | 0.000 | 0.000 | 0.062           | 0.067 | 0.089 |
| <b>KS4_CVAP3APS</b>        |                 |       |       |                 |       |       |
| 1                          | 0.073           | 0.060 | 0.024 | 0.000           | 0.000 | 0.000 |
| 2                          | 0.002           | 0.002 | 0.043 | 0.000           | 0.000 | 0.000 |
| 3                          | 0.011           | 0.096 | 0.037 | 0.000           | 0.000 | 0.000 |
| 4                          | 0.016           | 0.004 | 0.007 | 0.000           | 0.000 | 0.000 |
| 5                          | 0.044           | 0.005 | 0.003 | 0.000           | 0.000 | 0.000 |
| <b>KS4_CVAP2APS</b>        |                 |       |       |                 |       |       |
| 1                          | 0.000           | 0.000 | 0.000 | 0.000           | 0.000 | 0.000 |
| 2                          | 0.000           | 0.000 | 0.000 | 0.000           | 0.000 | 0.000 |
| 3                          | 0.000           | 0.000 | 0.000 | 0.000           | 0.000 | 0.000 |
| 4                          | 0.000           | 0.000 | 0.000 | 0.000           | 0.000 | 0.000 |
| 5                          | 0.000           | 0.000 | 0.000 | 0.000           | 0.000 | 0.000 |
| <b>W7PayYrMain_Banded1</b> |                 |       |       |                 |       |       |
| 1                          | 0.000           | 0.000 | 0.000 | 0.000           | 0.000 | 0.000 |
| 2                          | 0.000           | 0.000 | 0.000 | 0.000           | 0.000 | 0.000 |

|                      |       |       |       |       |       |       |
|----------------------|-------|-------|-------|-------|-------|-------|
| 3                    | 0.000 | 0.000 | 0.000 | 0.000 | 0.000 | 0.000 |
| 4                    | 0.000 | 0.000 | 0.000 | 0.000 | 0.000 | 0.000 |
| 5                    | 0.002 | 0.000 | 0.000 | 0.000 | 0.000 | 0.000 |
| <b>W1GrssyrHH</b>    |       |       |       |       |       |       |
| 1                    | 0.000 | 0.000 | 0.000 | 0.143 | 0.094 | 0.010 |
| 2                    | 0.000 | 0.000 | 0.000 | 0.165 | 0.011 | 0.367 |
| 3                    | 0.000 | 0.000 | 0.000 | 0.194 | 0.183 | 0.168 |
| 4                    | 0.000 | 0.000 | 0.000 | 0.693 | 0.303 | 0.095 |
| 5                    | 0.000 | 0.000 | 0.000 | 0.032 | 0.184 | 0.356 |
| <b>W2GrssyrHH</b>    |       |       |       |       |       |       |
| 1                    | 0.000 | 0.000 | 0.000 | 0.000 | 0.000 | 0.000 |
| 2                    | 0.000 | 0.000 | 0.000 | 0.000 | 0.000 | 0.000 |
| 3                    | 0.000 | 0.000 | 0.000 | 0.002 | 0.000 | 0.000 |
| 4                    | 0.000 | 0.000 | 0.000 | 0.000 | 0.000 | 0.000 |
| 5                    | 0.000 | 0.000 | 0.000 | 0.001 | 0.000 | 0.000 |
| <b>W1yschat1</b>     |       |       |       |       |       |       |
| 1                    | 0.000 | 0.002 | 0.000 | 0.027 | 0.787 | 0.758 |
| 2                    | 0.000 | 0.000 | 0.000 | 0.897 | 0.628 | 0.475 |
| 3                    | 0.000 | 0.000 | 0.000 | 0.663 | 0.104 | 0.658 |
| 4                    | 0.000 | 0.000 | 0.000 | 0.226 | 0.486 | 0.766 |
| 5                    | 0.000 | 0.000 | 0.000 | 0.388 | 0.369 | 0.203 |
| <b>W2yschat1</b>     |       |       |       |       |       |       |
| 1                    | 0.000 | 0.000 | 0.000 | 0.000 | 0.321 | 0.005 |
| 2                    | 0.000 | 0.000 | 0.806 | 0.002 | 0.111 | 0.138 |
| 3                    | 0.000 | 0.000 | 0.000 | 0.01  | 0.000 | 0.020 |
| 4                    | 0.000 | 0.000 | 0.000 | 0.064 | 0.000 | 0.113 |
| 5                    | 0.000 | 0.000 | 0.000 | 0.003 | 0.100 | 0.005 |
| <b>W2BenTotBand1</b> |       |       |       |       |       |       |
| 1                    | 0.000 | 0.000 | 0.000 | 0.000 | 0.000 | 0.005 |
| 2                    | 0.000 | 0.000 | 0.000 | 0.000 | 0.000 | 0.000 |
| 3                    | 0.000 | 0.000 | 0.000 | 0.000 | 0.000 | 0.000 |
| 4                    | 0.000 | 0.000 | 0.000 | 0.027 | 0.000 | 0.002 |
| 5                    | 0.000 | 0.000 | 0.000 | 0.000 | 0.001 | 0.000 |

+ The p-values are reported for tests at 5% significance levels. The tests results for 10% and 1% significance levels are identical.
